1 **Positional cues underlie cell fate specification during branching morphogenesis of the**  
2 **embryonic mammary epithelium**

3

4 Claudia Carabaña<sup>1</sup>, Wenjie Sun<sup>1</sup>, Meghan Perkins<sup>1</sup>, Varun Kapoor<sup>1,3</sup>, Robin Journot<sup>1</sup>, Fatima  
5 Hartani<sup>1</sup>, Marisa M. Faraldo<sup>1</sup>, Bethan Lloyd-Lewis<sup>2\*</sup>, Silvia Fre<sup>1\*</sup>.

6

7 <sup>1</sup> Institut Curie, Laboratory of Genetics and Developmental Biology, PSL Research University,  
8 INSERM U934, CNRS UMR3215, 75248 Paris, France.

9 <sup>2</sup> School of Cellular and Molecular Medicine, University of Bristol, Biomedical Sciences Building,  
10 Bristol, BS8 1TD, UK.

11 <sup>3</sup> Department of AI Research, Kapoorlabs, 75005, Paris, France.

12

13 \* Corresponding authors who jointly supervised this work: [bethan.lloyd-lewis@bristol.ac.uk](mailto:bethan.lloyd-lewis@bristol.ac.uk) and  
14 [silvia.fre@curie.fr](mailto:silvia.fre@curie.fr)

15

16

17 **Abstract**

18 How cells coordinate morphogenetic cues and fate specification during development is a fundamental  
19 question at the basis of tissue formation. Lineage tracing studies have demonstrated that many  
20 stratified epithelia, including the mammary gland, first arise from multipotent stem cells, which are  
21 progressively replaced by distinct pools of unipotent progenitors that maintain tissue homeostasis  
22 postnatally. The lack of specific markers for early fate specification in the mammary gland has  
23 prevented the delineation of the features and spatial localization of lineage-committed progenitors  
24 that co-exist with multipotent stem cells (MaSCs) during tissue development. Here, using single-cell  
25 RNA-sequencing across 4 stages of embryonic development, we reconstructed the differentiation  
26 trajectories of multipotent mammary stem cells towards basal and luminal fate. Our data revealed that  
27 MaSCs can already be resolved into distinct populations exhibiting lineage commitment at the time  
28 coinciding with the first sprouting events of mammary branching morphogenesis (E15.5). By  
29 visualizing gene expression across our developmental atlas, we provide novel molecular markers for  
30 committed and multipotent MaSCs, and define their spatial distribution within the developing tissue.  
31 Furthermore, we show that the mammary embryonic mesenchyme is composed of two spatially-  
32 restricted cell populations, representing the sub-epithelial and dermal mesenchyme. Mechanistically,  
33 we explored the communication between different subsets of mesenchymal and epithelial cells, using  
34 time-lapse analysis of mammary embryonic explant cultures, and reveal that mesenchymal-produced  
35 FGF10 accelerates embryonic mammary branching morphogenesis without affecting cell  
36 proliferation. Altogether, our data elucidate the spatiotemporal signals underlying lineage specification  
37 of multipotent mammary stem cells and uncover the paracrine interactions between epithelial and  
38 mesenchymal cells that guide mammary branching morphogenesis.

39

40

## 41 **Introduction**

42 To generate functional organs, cell fate acquisition and multicellular morphogenetic events must be  
43 tightly coordinated. Accordingly, lineage commitment encompasses a progressive differentiation  
44 process dictated by transcriptional and mechanical changes to drive the formation of specialist tissues  
45 of complex shapes and function (Chan et al., 2017). The development of the branched mammary  
46 gland (MG) is a case in point, being initially formed from multipotent embryonic mammary stem cells  
47 (MaSCs) which reorganize through individual and collective movements during branching  
48 morphogenesis until committing to specific luminal and basal lineages at birth. Subsequently,  
49 unipotent progenitors drive adult homeostasis (Blaas et al., 2016; Davis et al., 2016; Lilja et al., 2018;  
50 Lloyd-Lewis et al., 2018; Prater et al., 2014; Scheele et al., 2017; van Amerongen et al., 2012; van  
51 Keymeulen et al., 2011; Wuidart et al., 2016, 2018). The embryonic mammary gland therefore  
52 represents a powerful tissue paradigm to study the integration of stem cell fate specification with  
53 tissue morphogenesis.

54 Mouse mammary gland development begins at embryonic day (E) 10 with the formation of bilateral  
55 milk lines, followed by the asynchronous appearance of five pairs of epithelial placodes positioned  
56 symmetrically at each side of the embryo. By E13, these placodes invaginate into the underlying  
57 mesenchyme to give rise to mammary buds. At around E15.5, the epithelium undergoes the first  
58 sprouting event to invade the underlying fat pad precursor, triggering branching morphogenesis and  
59 the formation of a small rudimentary ductal tree by birth (reviewed in (Watson & Khaled, 2020)). The  
60 mammary ductal network is composed of a bilayered epithelium comprising two main cell types: an  
61 outer layer of myoepithelial or basal cells (BCs) adjacent to the basement membrane and an inner  
62 layer of polarized luminal cells (LCs), facing the ductal lumen, that encompass hormone receptor  
63 (namely Estrogen ( $ER\alpha$ ) and Progesterone (PR) receptors) expressing and non-expressing  
64 subpopulations.

65 We have recently shown that the lineage bias of MaSCs occurs progressively within a narrow  
66 developmental window around embryonic day E15.5, a surprisingly early time in mammogenesis (Lilja  
67 et al., 2018). Strikingly, this bias towards luminal and basal cell fates coincides with the remarkable  
68 epithelial remodeling that occurs during the first embryonic mammary branching event. Yet, the  
69 precise timing of lineage specification during this crucial stage of mammary gland morphogenesis  
70 remains unclear, hampered by the lack of specific markers for early fate specification.

71 It is now well-established that cell-fate-specific changes in gene expression can modify the properties  
72 of a growing tissue and affect its morphogenesis and patterning. In the mammary epithelium, recent  
73 studies performed single-cell RNA sequencing (scRNA-seq) analysis at distinct stages of mammary  
74 embryonic development and proposed a model whereby multipotent MaSCs drive the earliest stages  
75 of mammogenesis. These studies identified subsets of embryonic mammary cells characterized by

76 'hybrid' transcriptional signatures and harboring concomitant expression of luminal and basal genes  
77 (Giraddi et al., 2018; Wuidart et al., 2018). In contrast, alternative scRNA-seq studies suggested that  
78 only Mammary Epithelial Cells (MECs) with basal characteristics are present in the embryonic gland,  
79 and that these bipotent progenitors generate mammary luminal cells postnatally (Pal et al., 2021).  
80 Recent single nucleus Assay for Transposase Accessible Chromatin sequencing (snATAC-seq)  
81 analyses, however, revealed that MECs at E18.5 exhibit either a basal-like or luminal-like chromatin  
82 accessibility profile, suggesting the potential priming of these cells to a lineage-restricted state prior  
83 to birth (Chung et al., 2019).

84 Given these uncertainties, here we sought to further define the potency of mammary stem cells and  
85 the timing of fate acquisition with spatiotemporal resolution during embryonic mammary  
86 morphogenesis, by coupling single cell transcriptional mapping at different developmental timescales  
87 with *ex vivo* live imaging of mammary embryonic cell dynamics during branching morphogenesis. This  
88 enabled us to finely dissect the heterogeneity of the mammary gland epithelium throughout embryonic  
89 development and define the transcriptional programs orchestrating the lineage restriction of  
90 multipotent MaSCs to unipotent progenitors. Importantly, our integrative approach prospectively  
91 identified new markers for specific mammary cells, and provided fundamental insights into the  
92 resident mammary embryonic mesenchymal cells that direct branching morphogenesis.

93

## 94 **Results**

### 95 **Lineage restriction is a progressive developmental process**

96 How changes in mammary tissue architecture during morphogenesis translate into differential gene  
97 expression patterns that drive the lineage specification of individual cells during development remains  
98 unknown in many tissue contexts. To address this in the MG, we performed scRNA-seq analysis of  
99 mouse embryonic mammary tissues at four developmental times spanning mammary bud  
100 invagination (E13.5), initial sprouting events at the presumptive onset of lineage segregation (E14.5  
101 and E15.5) (Lilja et al., 2018) and post-natal branching morphogenesis (at birth or Post-natal day 0,  
102 P0) (Figure 1A). At each timepoint, we micro-dissected mammary buds from female mouse embryos  
103 (pooling tissues from 7-12 embryos isolated from different pregnant dams) and isolated mammary  
104 epithelial (EpCAM<sup>+</sup>) and stromal (EpCAM<sup>-</sup>) cells by FACS for scRNA-seq using the 10x Chromium  
105 platform. Basal and luminal subpopulations are indistinguishable in embryonic mammary glands using  
106 the EpCAM and CD49f gating strategies routinely applied to adult tissues (Figure S1A).

107 Using the Seurat R package (Stuart et al., 2019), unsupervised clustering of single cell expression  
108 data revealed distinct cell clusters at E13.5, E14.5, E15.5 and P0, respectively (Figure S1B), which  
109 were manually annotated by matching enriched gene sets with known markers of mammary



110 epithelium, mesenchyme and skin cells. With the objective of mapping MECs undergoing lineage  
111 commitment early in embryogenesis, we removed contaminating skin cells (Figure S1B) and  
112 performed a sub-clustering analysis of epithelial populations at each developmental timepoint. A  
113 cluster composed of proliferative epithelial cells was identified at E15.5, based on a list of cell cycle  
114 related genes, which were omitted from further analysis (Figure S1C-D). While this analysis identified  
115 a single population of MECs at the early E13.5 and E14.5 developmental times, 3 transcriptionally  
116 distinct cell clusters were apparent at E15.5 and P0 (Figure 1B, 1D, S1B). The detection of 3 MECs  
117 clusters at E15.5 was surprising, as previous studies observed a single population around this  
118 developmental stage (Girardi et al., 2018). To investigate this further, we calculated a single-cell ID  
119 score for “basal-like” and “luminal-like” cells based on previously published transcriptomic analyses  
120 of adult MECs (Kendrick et al., 2008). A higher single-cell ID score reflects increasing similarity to the  
121 reference cell type: adult basal or luminal cells. Interestingly, this analysis revealed that E15.5 MECs  
122 can already be resolved into 3 distinct groups: luminal-like cells, basal-like cells and a hybrid cell  
123 population co-expressing luminal and basal genes (Figure 1C, S1E). As expected, lineage markers  
124 commonly used to distinguish LCs (*Krt8*, *Krt18*) from BCs (*Krt5*, *Trp63*) in the postnatal mammary  
125 gland were co-expressed in all 3 MECs clusters at E15.5 (Figure S1F). Importantly, alongside  
126 established markers for adult BCs (*Lmo1*, *Pthlh*, *Cxcl14*) and LCs (*Anxa1*, *Ly6d*) (Kendrick et al.,  
127 2008), this analysis also identified genes that had not been previously ascribed to distinct mammary  
128 BC or LC populations.

129 By applying a computed ID score for each epithelial adult cell type (Kendrick et al., 2008) to the 3  
130 transcriptionally distinct cell populations observed at P0 (Figure 1D), BCs (*Acta2*<sup>+</sup>, *Myh11*<sup>+</sup>), luminal  
131 progenitors (LP) (*Notch1*<sup>+</sup>, *Aldh1a3*<sup>+</sup>, *Lypd3*<sup>+</sup>) and mature luminal (ML) cells (*Prlr*<sup>+</sup>, *Cited1*<sup>+</sup>, *Esr1*<sup>+</sup>)  
132 could be clearly distinguished (Figure 1E). This corroborates our previous findings indicating that  
133 MECs are already committed to 3 distinct lineages at birth (Lilja et al., 2018). Moreover, these results  
134 are consistent with previous snATAC-seq analyses of the embryonic mammary gland, which also  
135 identified 3 separate clusters at E18.5 (Chung et al., 2019). Collectively, our data supports a model  
136 whereby mammary epithelial cell lineages are progressively being specified throughout development  
137 and are well segregated at birth.

138 We next ordered the cells along pseudo-temporal trajectories to infer the differentiation path of  
139 embryonic MECs towards luminal or basal fate. Since we observed that the 2<sup>nd</sup> principal component  
140 of the PCA was highly correlated to the age of the embryos analyzed, we used it as a proxy for  
141 developmental stage (y-axis) and plotted it against the basal and luminal scores computed above  
142 (Figure 1C) on the x-axis (Kendrick et al., 2008) (Figure 1F-G, S1G). The resulting plot indicates, as  
143 predicted, that E13.5 mammary cells lie at the origin of the mammary cellular hierarchy, with E15.5  
144 cell populations occupying intermediate positions and P0 MECs positioned at the end of two divergent  
145 trajectories, representing the binary cell fate choice between basal or luminal differentiation.

146 Remarkably, we noticed that basal-like cells at E15.5 can either transition towards the P0 basal  
147 cluster, or to a hybrid cell state that will give rise to LCs (Figure 1G), suggesting that they might lie at  
148 the origin of both lineages.

149 Together, our temporal scRNA-seq atlas reveals the molecular changes associated with progressive  
150 lineage restriction and identifies subsets of MECs that are already biased towards basal or luminal  
151 cell fate at embryonic day E15.5. Thus, both committed (i.e. conceivably unipotent) and  
152 undifferentiated (putative multipotent) cells likely exist at this important developmental stage in  
153 mammaryogenesis, which coincides with the first morphogenetic events of mammary epithelial  
154 branching and duct elongation (Lilja et al., 2018).

155

### 156 **Luminal and basal progenitors are already spatially segregated at E15.5**

157 We next sought to identify differentially expressed genes for each mammary epithelial cluster by  
158 examining their dynamic expression profile towards luminal or basal differentiation trajectories. While  
159 our compiled scRNA-seq atlas emphasized the vast cellular heterogeneity of the embryonic mammary  
160 epithelium, this extended analysis identified different patterns of expression along the process of  
161 basal (Figure 2A) or luminal (Figure 2B) differentiation throughout embryonic development (from  
162 E13.5 to P0).

163 On the basal trajectory we found 5 distinct patterns of expression. Patterns 3 and 4 contained genes  
164 with sustained increased expression in early embryonic developmental times, at E13.5 and E14.5.  
165 Known key regulators of mammary bud epithelial cells are highly expressed only during early  
166 embryonic development, including *Ndnf*, *Pthlh*, *Msx1*, *Tbx3*, *Sostdc1*, whose expression is lost before  
167 birth. Moreover, multiple Wnt related genes, such as *Wnt3*, *Wnt6* and *Fzd10*, were enriched at these  
168 early developmental stages.

169 A different subset of genes, mostly related to cell migration (*Ptp4a1*, *Fam60a*, *Ralbp1*), appeared to  
170 be transiently upregulated at E15.5 (Pattern 5). Transcripts involved in mammary basal differentiation  
171 were progressively increasing towards the P0 basal cluster (Pattern 1); these included myosin-related  
172 proteins (*Myl6*, *Myl9*, *Myh11*, *Mylk*) and genes associated to ECM composition and organization  
173 (*Lama4*, *Adamts4*, *Itga1*, *Col9a1*, *Col4a1*, *Col11a1*, *Col16a1*). In addition, towards the P0 basal  
174 cluster, we also found increased expression levels of genes regulating cell proliferation (*Top1*,  
175 *Cdkn1a*, *Runx1*, *Fosl1*), cytoskeletal organization (*Tuba1c*, *Tubb6*) and angiogenesis (*Tnfrsf12a*,  
176 *Serpine1*, *Tgfa*, *Hbegf*) in Pattern 2, suggesting that epithelial growth is highly regulated at this  
177 developmental stage.

178 On the other hand, we observed 7 distinct expression patterns along the luminal differentiation  
179 trajectory. As expected, the pattern exhibiting increasing expression across the mammary

180 developmental trajectory contains genes with known luminal characteristics, such as *Krt8*, *Krt18* and  
181 *Krt19* (Pattern 3). A second group of genes that is switched on during late stages of differentiation is  
182 enriched for ML cells markers, such as *Cited1* and *Prlr* (Pattern 1). Genes expressed at the beginning  
183 of the differentiation process and subsequently repressed along the luminal trajectory include typical  
184 basal markers, such as *Krt5* and *Krt14* (Pattern 7). *Sox11* also presents this dynamic pattern of  
185 expression, gradually decreasing along the differentiation process. Indeed, *Sox11* is expressed in  
186 MECs only during the early stages of MG embryonic development – when MG epithelial cells are  
187 largely quiescent – and is no longer detected by E16.5, consistent with our results. Of interest, *Sox11*  
188 has been recently involved in cell fate regulation in the embryonic MG (Tsang et al., 2021). Genes  
189 involved in epithelial stratification, such as *Lgals7*, *Dsc3* and *Krtdap*, are switched on only in luminal-  
190 like cells present at E15.5 (Pattern 6). Finally, Pattern 2 comprises genes encoding for several Heat  
191 shock proteins (Hsps). There is growing evidence that Hsps may impact neurodevelopment through  
192 specific pathways regulating cell differentiation, migration or angiogenesis (Miller & Fort, 2018).

193 To investigate whether lineage bias is reflected by spatial segregation of cells acquiring luminal or  
194 basal characteristics during embryonic development, we first identified genes that exhibited a lineage-  
195 specific expression pattern along the differentiation trajectories (Figure 3A-C). These included *Cxcl14*,  
196 *Ndnf* and *Pthlh* (Figure 2A) and *Anxa1*, *Plet1* and *Lgals3* (Figure 2B and S2E) for basal and luminal  
197 lineage specification respectively. Using single molecule RNA-fluorescence *in situ* hybridization  
198 (smRNA-FISH), we subsequently examined the spatiotemporal expression pattern of selected genes  
199 at distinct stages of mammary embryonic development. Probes for the luminal specific membrane-  
200 associated protein Annexin A1 (*Anxa1*) (Fankhaenel et al., 2021) and the basal-specific secreted  
201 chemokine *Cxcl14* (Sjöberg et al., 2016) revealed that at early embryonic stages (E13.5), *Cxcl14* is  
202 expressed in all MECs, and *Anxa1* is lowly expressed in rare cells homogeneously distributed within  
203 the mammary bud (Figure 3D). However, at the critical developmental time of E15.5, the transcripts  
204 for these two genes show divergent spatial distribution patterns, with *Anxa1* expression being mainly  
205 confined to cells in the inner bud region and *Cxcl14* transcripts restricted to the external cell layers in  
206 contact or close proximity with the BM (Figure 3D). By P0, *Anxa1* and *Cxcl14* showed clear luminal  
207 and basal restricted expression respectively (Figure 3E). To quantify the spatial segregation of gene  
208 expression, we divided the mammary bud into three concentric “rings” (outer, middle and internal  
209 regions) (Figure S2A) and counted the number of RNA molecules (represented by each dot) within  
210 each ring for both markers. This unbiased approach confirmed the uniform expression pattern of  
211 *Anxa1* and *Cxcl14* transcripts in all 3 regions of the mammary bud at E13.5 (Figure 3F). By E15.5,  
212 however, *Anxa1* transcripts were prominently restricted to the middle and inner ring, while *Cxcl14*  
213 transcripts appeared preferentially localized to the middle and outer ring of the mammary bud (Figure  
214 3F). This was particularly intriguing as all MECs still express K5 (in white in Figure 3D, S2B-C) and  
215 other known markers of adult LCs and BCs at this developmental stage (Figure S2D). Thus, *Anxa1*

216 and *Cxcl14* represent novel markers of MECs committed to luminal and basal lineages, respectively,  
217 as early as E15.5 during mammary development. Analogous smRNA-FISH analysis of E15.5  
218 mammary buds with additional probes suggested that *Ndnf* and *Pthlh* are also expressed in  
219 embryonic basal committed MECs, while *Plet1* and *Lgals3* expression likely mark cells biased towards  
220 the luminal lineage (Figure S2B-C), further corroborating our temporal scRNA-seq analysis (Figure  
221 2A-B).

222 In light of our findings that a proportion of MECs are already lineage committed at E15.5, we next  
223 sought to examine the spatial localization of cells possessing a hybrid basal-luminal expression  
224 signature within the developing mammary bud. To this aim, we searched for genes associated with  
225 the hybrid cell cluster identified at E15.5 (Figure 1B). A promising candidate marker gene for this  
226 cluster was the HLA class II cell surface receptor *Cd74* (Figure 3C, S2E), previously proposed as a  
227 putative mammary stem cell marker (dos Santos et al., 2013). smRNA-FISH analysis revealed that,  
228 while *Cd74* expression overlapped with both *Anxa1* and *Cxcl14* in early mammary embryonic  
229 development (E13.5), the vast majority of *Cd74* transcripts resided in the middle and outer regions of  
230 the mammary bud at E15.5, coinciding with *Cxcl14* expression (Figure 3G-J). Thus, the hybrid cells  
231 identified by transcriptomic analysis at E15.5 appear to be primarily localized in proximity with the BM,  
232 where basal-committed cells are also found within growing mammary buds.

233 Collectively, our spatial transcriptomic data reveal that the embryonic basal-like and luminal-like  
234 mammary cell clusters identified by scRNA-seq are already located in defined and mutually exclusive  
235 positions within the mammary bud at E15.5, at the onset of branching morphogenesis. Spatial  
236 segregation of mammary embryonic progenitors may conceivably underlie their state of differentiation  
237 and lineage commitment at this critical stage of embryonic mammary development.

238

### 239 **Identification of two spatially distinct mesenchymal cell populations in the embryonic** 240 **mammary stroma**

241 Mammary epithelial buds at E13.5 are surrounded by a specialized mammary mesenchyme,  
242 subsequently undergoing sprouting to invade the underlying fat pad precursor at around E15.5 to  
243 initiate the first stages of branching morphogenesis. Paracrine signaling between mammary epithelial  
244 and surrounding mesenchymal cells is indispensable for this process (Spina & Cowin, 2021;  
245 Wansbury et al., 2011). To gain further insights into mammary mesenchymal patterning during  
246 embryonic development, we focused our analysis on the scRNA-seq data of mesenchymal cells at  
247 E13.5, E15.5 and P0. Clustering of non-epithelial cells identified three mammary mesenchymal cell  
248 subsets at each stage (Figure 4A). By computing a cell cycle score based on a list of cell cycle-related  
249 genes, we identified proliferative cell clusters exclusively at early developmental timepoints, E13.5  
250 and E15.5 (Figure S3A), indicating that proliferative cell populations are mostly absent at birth.

251 We next singled out specific markers defining the two non-proliferative mesenchymal clusters at  
252 E15.5 (Figure S3B). Candidate genes included *Esr1* (coding for the ER $\alpha$ ) and *Plagl1* (coding for the  
253 zinc finger protein PLAGL1), which were highly expressed in opposing mesenchymal clusters (Figure  
254 4B-C, S3B). Immunostaining for ER $\alpha$  showed clear expression in mesenchymal cells directly  
255 surrounding the mammary bud (Figure 4D), as previously reported (Wansbury et al., 2011).  
256 Immunofluorescence analysis for PLAGL1, on the other hand, revealed that PLAGL1<sup>+</sup> mesenchymal  
257 cells are located further away from the mammary epithelium (Figure 4E). These results suggest that  
258 the two transcriptionally distinct mesenchymal populations are also differentially localized within the  
259 embryonic mammary stroma, and can be categorized based on their proximity to the mammary  
260 epithelial bud. We thus refer to cells closest to the epithelium as the sub-epithelial mesenchyme and  
261 those located further away as dermal mesenchyme.

262 The heterogeneity of mesenchymal cells and the complexity of the mammary stroma increases at  
263 birth, where two clusters of *Dpt*<sup>+</sup> fibroblasts can be distinguished, namely *Col15a1*<sup>+</sup> and *Pi16*<sup>+</sup> clusters,  
264 as previously identified across 17 other tissues (Buechler et al., 2021). Interestingly, the *Col15a1*<sup>+</sup>*Dpt*<sup>+</sup>  
265 population also expresses *Fabp4*, *Pparg* and *Aoc3*, surface markers of pre-adipocytes. Conversely,  
266 the *Pi16*<sup>+</sup>*Dpt*<sup>+</sup> population expresses *Dpp4*, *Sema3c* and *Wnt2*, which are reported to be upregulated  
267 in subcutaneous mesenchymal progenitors (Merrick et al., 2019) (Figure 4A, S3C). Structural and  
268 matricellular proteins of the ECM (*Col4a1*, *Col4a2*, *Col18a1*, *Mmp19*, *Sdc1*, *Sparcl1*) are also highly  
269 expressed in the *Col15a1*<sup>+</sup>*Dpt*<sup>+</sup> population. Finally, the third mesenchymal population identified at P0  
270 displays elevated expression of *Eln*, *Mfap4*, *Mgp*, genes typically expressed by smooth muscle cells.

271

## 272 **FGF10 produced by the dermal mesenchyme is an important regulator of embryonic mammary** 273 **morphogenesis**

274 Communication between the mammary epithelial and stromal compartment is essential for branching  
275 morphogenesis (Inman et al., 2015). Thus, in light of the observed spatial patterning of mesenchymal  
276 cells at E15.5 (Figure 4), we next sought to computationally predict specific paracrine interactions  
277 between the identified mesenchymal cell subsets and MECs using CellPhoneDB, a bioinformatic tool  
278 designed to predict highly significant ligand-receptor interactions between two cell types from scRNA-  
279 seq data (Vento-Tormo et al., 2018). We focused on ligand-receptor interaction pairs between the  
280 sub-epithelial or dermal mesenchyme and the basal-like cluster of MECs at E15.5, which we  
281 established to be in direct contact or in close proximity to the BM (Figure 3D-E). This approach  
282 highlighted several developmental signaling pathway components, including FGF, Wnt and Notch  
283 receptors and ligands, as putative mediators of the cross-talk between E15.5 basal-like cells and the  
284 sub-epithelial or dermal mesenchyme (Figure S4). Of particular interest, specific interactions between  
285 the FGFR2 and its soluble ligand FGF10, as well as between the Transforming growth factor beta



286 receptors TGFBR1 and TGFBR2 and their ligand TGFB2 were highly significant between basal-like  
287 MECs and the more distant dermal mesenchymal cells (Figure S4). To functionally assess the validity  
288 of this computational prediction, we sought to investigate the impact of exogenous FGF10 on  
289 embryonic branching morphogenesis by live cell imaging of mammary buds established in *ex vivo*  
290 cultures. Explant cultures provide a highly tractable system for modelling embryonic mammary cell  
291 behavior and branching morphogenesis (Carabaña & Lloyd-Lewis, 2022; Voutilainen et al., 2013).  
292 Embryonic mammary buds along with their surrounding mesenchyme were dissected at E13.5 and  
293 cultured *ex vivo* on an air-liquid interface. Embryonic MECs expressed both basal and luminal markers  
294 (K5, K14 and P63 for basal cells and K8 for luminal cells) after 24h in culture (Figure S5A-C),  
295 consistent with *in vivo* observations (Figure S2D) (Wansbury et al., 2011). During 8 days of *ex vivo*  
296 culture, embryonic mammary buds undergo sprouting and branching, recapitulating the  
297 morphogenetic events occurring *in vivo* (Figure S5D-E). Immunostaining of the resulting 8-day-old  
298 ductal tree (corresponding to approximately P0/P1 *in vivo*) revealed that MECs in the outer layer  
299 express basal markers such as P63 (Figure S5D, S5F) and smooth muscle actin ( $\alpha$ -SMA) (Figure  
300 S5E), while inner layer cells express the luminal marker K8 (Figure S5D-E). In addition, polarity  
301 acquisition appeared normal, as revealed by apical ZO-1 staining in the inner layer of luminal cells  
302 (Figure S5F). Thus, key aspects of embryonic mammary morphogenesis and epithelial lineage  
303 segregation can be reconstituted in *ex vivo* cultures.

304 Taking advantage of this powerful system, we next investigated the impact of FGF signaling by  
305 undertaking live-imaging of embryonic mammary explants cultured with FGF10 (Figure 5A). To  
306 measure the velocity of branch growth in control and FGF10 treated conditions, after 4 days in culture  
307 we traced the endpoint of each branch acquired every 60 min for 24 hr. By measuring the distance  
308 travelled over time in control and FGF10 treated conditions, these experiments indicated that  
309 mammary branches grow faster when cultured in the presence of FGF10 (Figure 5B).

310 Mesenchymal-produced FGF10 may accelerate branching morphogenesis by increasing either  
311 epithelial cell proliferation or motility. To discriminate between these two possibilities, we measured  
312 the planar surface area of mammary buds over time and found that tissue growth was not significantly  
313 affected by FGF10, since the explant area increased 2-fold within 16 hours of culture in both control  
314 and FGF10 conditions (Figure 5C). While FGF10 is a potent mitogen in several contexts, 5-ethynyl-  
315 2'-deoxyuridine (EdU) incorporation experiments suggested that it did not promote mammary  
316 epithelial cell proliferation during branch elongation in *ex vivo* cultures (Figure 5D-E). Moreover, the  
317 number of branches in embryonic explant cultures supplemented with FGF10 was equivalent to  
318 control cultures (Figure 5F). However, the diameter of branches at their base was reduced in the  
319 presence of FGF10 (Figure 5G), suggesting that while MEC numbers are equivalent, cells may move  
320 faster along extending ducts, which consequently become thinner in the presence of FGF10. Our data  
321 therefore shows that, similar to observations made during pubertal branching morphogenesis

322 (Hannezo et al., 2017), FGF signaling promotes branching of the embryonic mammary ductal tree at  
323 the initial stages of embryonic development, likely by promoting epithelial cell motility.

324

## 325 **Discussion**

326 To generate complex organs of diverse shapes and function, tissue morphogenesis and cell fate  
327 specification must be tightly coordinated. Yet, how morphological changes steer individual cells  
328 towards a particular fate and, conversely, how cell fate decisions orchestrate morphogenesis, remain  
329 ambiguous. By combining temporal scRNA-seq analysis with spatial transcriptomics and live imaging  
330 of tissue explant cultures, this work provides new insights into the progressive lineage specification  
331 of epithelial cells during embryonic mammary ductal development.

332 Our data revealed that embryonic MECs at E15.5 can already be distinguished as three  
333 transcriptionally discrete cell populations: basal-like cells, luminal-like cells and 'hybrid' cells. This was  
334 surprising, as previous scRNAseq studies concluded that bipotent MaSCs, sharing luminal and basal  
335 characteristics, exist throughout embryogenesis, and the two separate lineages are only specified  
336 postnatally (Girardi et al., 2018; Wuidart et al., 2018). The high quality and depth of sequencing  
337 attained in this study, however, likely enabled us to identify different embryonic MEC clusters that  
338 were previously indistinguishable by gene expression. Indeed, more recent snATAC-seq analysis of  
339 E18.5 and adult MG revealed that E18.5 MECs, although still presenting fetal-specific features, are  
340 partially lineage-biased and already harbor adult-like basal, LP and ML characteristics (Chung et al.,  
341 2019). The results presented herein are also consistent with our previous lineage tracing and  
342 theoretical modeling analyses (Lilja et al., 2018), which implied that lineage potential restriction  
343 coincides with the initiation of branching morphogenesis around E15.5. Collectively, our data supports  
344 a model whereby these two processes are linked. As cells rearrange their position within the growing  
345 tissue, coordination between cell differentiation and cell movements may be mediated by their  
346 exposure to changing environmental cues. By determining the regional positioning of the different cell  
347 clusters that we identified by scRNAseq, we observed that luminal and basal commitment is indeed  
348 reflected by differences in cell localization within the developing mammary epithelium. It is  
349 conceivable, therefore, that spatial segregation of mammary embryonic progenitors at this critical  
350 stage of development underpins their state of differentiation and lineage commitment.

351 Based on these results, we propose a dynamic hierarchical model of mammary differentiation  
352 spanning embryonic development (Figure 6). Mammary epithelial cells at E13.5 are undifferentiated  
353 and have yet to engage in lineage specification. As development and tissue morphogenesis progress,  
354 these putative multipotent embryonic MaSCs will first give rise to basal-like cells, designated as such  
355 based on their expression of several genes that define basal mammary cells postnatally. Basal-like  
356 cells will then either differentiate into basal unipotent progenitors by P0, or they will transition towards

357 a transcriptionally hybrid state. Hybrid cells, whose lineage potential remain unclear at this stage, will  
358 gradually lose basal markers concomitant with acquiring luminal gene expression, eventually giving  
359 rise to unipotent luminal cells at birth.

360 Embryonic MECs co-express the differentiation markers commonly used to distinguish LCs and BCs  
361 in the adult mammary gland (Figure S2D). This has, to date, hampered studies of the precise timing  
362 and molecular regulators of embryonic mammary lineage specification. The comprehensive single  
363 cell transcriptomic atlas compiled in this work enabled the spatial mapping of distinct subsets of  
364 embryonic mammary cells, some of which are already committed to basal or luminal fate. In addition  
365 to facilitating the *in situ* identification of potentially multipotent and unipotent mammary progenitors,  
366 the lineage-specific genes we discovered may be functionally important for dictating cell fate choices.  
367 These novel early markers of luminal or basal commitment likewise provide new specific promoters  
368 that could be used in future lineage tracing studies to definitively establish the differentiation dynamics  
369 and lineage potential of early mammary progenitors.

370 Additionally, our study provides important insights into the poorly explored resident mammary  
371 embryonic mesenchymal cell populations that direct epithelial branching morphogenesis. We  
372 identified specific transcriptional signatures that distinguish two spatially-restricted mesenchymal  
373 populations in mammary embryonic glands, named sub-epithelial and dermal mesenchyme. It  
374 remains unclear however how mesenchymal cells adopt a fibroblast or an adipocyte fate during  
375 embryonic development. Addressing this important question awaits future fate-mapping studies using  
376 specific stromal Cre drivers based on the promoters of genes identified in this work.

377 Ligand-receptor pair interaction analysis of the compiled scRNAseq data implicated several  
378 components of the FGF pathway as important mediators of communication between dermal  
379 mesenchyme and basal-like cells. Detailed scrutiny of differential gene expression in the sequenced  
380 mesenchymal embryonic cells, also revealed that the dermal mesenchyme contained cells expressing  
381 genes implicated in cell invasive behavior (*Cxcl12*) and axon guidance (*Nrp2*, *Epha3*, *Epha7*). These  
382 findings imply that dermal mesenchymal cells might secrete signaling factors that promote epithelial  
383 branching morphogenesis and fat pad invasion. In fact, knock-out mice for the FGF receptor *Fgfr2b*  
384 or its ligand *Fgf10* fail to develop mammary placodes, suggesting that FGF10-FGFR2B signaling is  
385 required to initiate embryonic mammary development (Mailleux et al., 2002). However, this phenotype  
386 precluded studies into the role of the FGF10-FGFR2B signaling axis on mammary embryonic  
387 development. *Ex vivo* mammary embryonic explant cultures, by contrast, provides opportunities to  
388 overcome challenges associated with genetic knock-out models. Our live-imaging data and custom-  
389 made image analysis pipeline revealed that, in the presence of exogenous FGF10, embryonic  
390 mammary branching is accelerated. Whether this is associated with more rapid differentiation of  
391 mammary progenitors, however, warrants further investigation in future studies.



392 In summary, this work reveals the cell-state heterogeneity of the embryonic mammary epithelium and  
393 surrounding mesenchyme, and provides important insights into the paracrine interactions that guide  
394 branching morphogenesis. Our computational analyses have uncovered the molecular mechanisms  
395 and transcription factors involved in regulating mammary cell fate specification. Furthermore, the  
396 lineage trajectory analysis reported herein could be extended to other stratified epithelia to determine  
397 whether these mechanisms are shared in other organs during embryonic development.

398

## 399 **STAR Methods**

### 400 **Mouse models**

401 *Ex vivo* cultures were established from the double fluorescent reporter R26<sup>mT/mG</sup> mice (Muzumdar et  
402 al., 2007) in a mixed genetic background. We exclusively analyzed female mice. WT C57B6 mice  
403 were analyzed at embryonic stages E13.5, E14.5 and E15.5, and during postnatal development at  
404 P0, as indicated in the figure legends. Plug detection at mid-day was considered 0.5 days-post-coitus  
405 (E0.5). Mice were genotyped by PCR analysis on genomic DNA extracted from an ear piece for adult  
406 mice or tail tip for embryos.

### 407 **Ethics Statement**

408 All studies and procedures involving animals were in accordance with the recommendations of the  
409 European Community (2010/63/UE) for the Protection of Vertebrate Animals used for Experimental  
410 and other Scientific Purposes. Approval was provided by the ethics committee of the French Ministry  
411 of Research (reference APAFIS #34364-202112151422480). We comply with internationally  
412 established principles of replacement, reduction, and refinement in accordance with the Guide for the  
413 Care and Use of Laboratory Animals (NRC 2011). Husbandry, supply of animals, as well as  
414 maintenance and care in the Animal Facility of Institut Curie (facility license #C75–05–18) before and  
415 during experiments fully satisfied the animal's needs and welfare. All mice were housed and bred in  
416 a specific-pathogen-free (SPF) barrier facility with a 12:12 hr light-dark cycle and food and water  
417 available *ad libitum*. Mice were sacrificed by cervical dislocation as adults or decapitated as embryos.

### 418 **Embryonic mammary gland dissection and *ex vivo* culture**

419 Mammary embryonic buds were dissected following the protocol developed by the laboratory of M.  
420 Mikkola (Voutilainen et al., 2013). Briefly, embryos were harvested from the uterus of a pregnant dam  
421 at day E13.5 of pregnancy. Under a dissecting microscope, an incision along the dorsal-lateral line  
422 from the hind limb to the forelimb in the right flank of the embryo was done using spring scissors. The  
423 flank of the embryo from the incision along the dorsal-lateral line to the midline was detached and the  
424 same steps were repeated for the left flank of the embryo, but this time cutting along the dorsal-lateral

425 line from the forelimb to the hind limb. Tissues were collected in a 24-well plate with phosphate  
426 buffered saline (PBS) until all embryos were dissected.

427 Next, proteolytic digestion of dissected embryonic flanks was performed as previously described (Lan  
428 & Mikkola, 2020). Tissues were incubated with freshly prepared 1.25 U/ml Dispase II solution (Roche,  
429 04942078001) at 4°C for 15 minutes. Then, with Pancreatin-Trypsin solution at room temperature  
430 (RT) for 4-5 minutes. To prepare Pancreatin-Trypsin working solution: first 0.225 g of Trypsin (Sigma-  
431 Aldrich, 85450C) were dissolved into 9 mL of Thyrode's solution [8 g/L NaCl (Sigma-Aldrich, S5886)  
432 + 0.2 g/L KCl (Sigma-Aldrich, P5405) + 0.05 g/L NaH<sub>2</sub>PO<sub>4</sub> • H<sub>2</sub>O (Sigma-Aldrich, S3522) + 1 g/L D-  
433 (+)-Glucose (Sigma-Aldrich, G7021) + 1 g/L NaHCO<sub>3</sub> (Sigma-Aldrich, S5761) dissolved in 1 L of  
434 distilled water and filter sterilized]. Then, 1 mL of 10X Pancreatin stock solution [0.85 g NaCl (Sigma-  
435 Aldrich, S5886) and 2.5 g Pancreatin (Sigma-Aldrich, P3292) dissolved into 100 mL of distilled water  
436 on a magnetic stirrer on ice for 4 hr and filter sterilized] and 20 µL of Penicillin-Streptomycin (10,000  
437 U/ml in stock) (Sigma-Aldrich, P4333) were added. Finally, pH was adjusted to 7.4 with NaOH and  
438 the solution was filter sterilized (see in (Lan & Mikkola, 2020)).

439 When skin epithelium started to detach from the edges of the mammary mesenchyme, the Pancreatin-  
440 Trypsin solution was replaced with DMEM/F-12 (Gibco-Thermo Fisher Scientific, 21331020)  
441 embryonic culture medium to inactivate the enzyme activity. After incubating the tissue for 20-30  
442 minutes in ice, the skin epidermis was removed away from the mesenchyme containing the embryonic  
443 mammary buds using two needles.

444 Mammary embryonic buds were established in *ex vivo* culture as previously detailed in (Carabaña &  
445 Lloyd-Lewis, 2022). Collected embryonic mammary tissue was placed on a cell culture insert floating  
446 on embryonic culture medium into a 35 mm cover glass-bottomed tissue culture dish (Fluorodish,  
447 81158). Embryonic culture medium is DMEM/F-12 (Gibco-Thermo Fisher Scientific, 21331020)  
448 supplemented with 2 mM GlutaMAX™ (Gibco-Thermo Fisher Scientific, 35050-038), 10% fetal bovine  
449 serum (FBS) (v/v), 20 U/ml Penicillin-Streptomycin (Gibco-Thermo Fisher Scientific, 15140122) and  
450 75 µg/mL Ascorbic acid (Sigma, A4544). Mammary cultures were maintained in a tissue culture  
451 incubator at 37°C with 5% CO<sub>2</sub>. The culture media was replaced every two days. For growth factor  
452 assays, 1 nM FGF10 (Bio-technie, 6224-FG) was added to the medium at day 4.

### 453 **Mammary cultures wholemount immunostaining**

454 *Ex vivo* cultures whole-mount immunostaining was performed as previously described (Carabaña &  
455 Lloyd-Lewis, 2022). Explants were transfer to a 24 well plate, washed in PBS and fixed with 4% PFA  
456 for 2 hr at RT. After a blocking step in PBS containing 5% FBS, 1% Bovine Serum Albumin (BSA)  
457 and 1% Triton x-100 (Euromedex, 2000-C) for 2 hr, explants were incubated with primary antibodies  
458 diluted in blocking buffer overnight at 4°C. Then, with secondary Alexa-fluor conjugated antibodies  
459 and DAPI (10µM) diluted in PBS for 5 hr at RT. *Ex vivo* cultures were mounted in a slide using Aqua-

460 Polymount (Polysciences, 18606). The following primary antibodies were used: rabbit anti-SMA  
461 (1:300, Abcam, ab5694), rat anti-K8 (1:300, Developmental Studies Hybridoma Bank, clone TROMA-  
462 I), mouse anti-P63 (1:300, Abcam, ab735), rabbit anti-K5 (1:300, Covance, PRB-160P-100), rat anti-  
463 ZO-1 (1:100, Millipore, MABT11), rabbit anti-K14 (1:300, Abcam, ab181595). Complete detail of the  
464 antibodies used here are provided in Key Resources Table 2.

465 EdU incorporation was visualized using Click-It chemistry (Invitrogen) by incubating *ex vivo* cultures  
466 for 2 hr with EdU solution (10  $\mu$ M). EdU was then detected with freshly made Click-iT EdU Alexa Fluor  
467 647 Imaging Kit (Invitrogen-Thermo Fisher Scientific, C10640), according to the manufacturer's  
468 protocol. Nuclei were stained with Hoechst33342 (10  $\mu$ g/mL) for 30 minutes at RT.

#### 469 **Immunostaining on 2D sections**

470 Embryos were harvested and fixed in 4% PFA overnight at 4°C, followed by another overnight  
471 incubation at 4°C in 30% sucrose. Then, embryos were embedded in optimum cutting temperature  
472 (OCT) compound and 7  $\mu$ m-thick cryosections were cut using a cryostat (Leica CM1950). After a  
473 blocking step in PBS containing 5% FBS, 2% BSA and 0.2% Triton x-100 for 2 hr, sections were  
474 incubated with primary antibodies diluted in blocking buffer overnight at 4°C in a humidified chamber,  
475 then with secondary Alexa-fluor conjugated antibodies and DAPI (10 $\mu$ M) diluted in PBS for 2 hr at  
476 RT. Finally, sections were mounted in a slide using Aqua-Polymount (Polysciences, 18606). The  
477 following primary antibodies were used: rat anti-K8 (1:300, Developmental Studies Hybridoma Bank,  
478 clone TROMA-I), mouse anti-P63 (1:300, Abcam, ab735), mouse anti-ERalpha (1:20, Agilent-Dako,  
479 M7047), rabbit anti-K5 (1:300, Covance, PRB-160P-100), rabbit anti-PLAG1 (1:100) (Spengler et al.,  
480 1997). Complete detail of the antibodies used here are provided in Key Resources Table 2.

#### 481 **Single molecule RNA fluorescence in situ hybridization (smRNA FISH)**

482 smRNA-FISH was performed using the RNAscope Multiplex Fluorescent Reagent Kit v2 (Advanced  
483 Cell Diagnostics), according to the manufacturer's recommendations. In brief, tissue cryosections  
484 were pre-treated with the target retrieval reagent (ACD, 322000) for 5 minutes and digested with  
485 Protease III (ACD, 322381) at 40°C for 15 minutes, before hybridization with the target oligonucleotide  
486 probes. Probe hybridization, amplification and binding of dye-labelled probes were performed  
487 sequentially. For subsequent immunostaining, sections were incubated in blocking buffer (PBS  
488 containing 5% FBS and 2% BSA) for 1 hr. For smRNA-FISH in *ex vivo* cultures, the blocking buffer  
489 also included 0,3% Triton x-100 (Euromedex, 2000-C) to allow tissue permeabilization. Incubation  
490 with primary antibodies diluted in blocking buffer was performed overnight at 4°C in a humidified  
491 chamber, then secondary antibodies and DAPI diluted in PBS were added for 2 hr at RT. The  
492 experiments were performed on at least three different embryos for each probe. Slides were mounted  
493 in ProLong Diamond Anti-fade Mountant (Invitrogen-Thermo Fisher Scientific, P36930) for imaging.

494 The following RNAscope probes were used: Mm-Anxa1-C2 (ACD, 509291), Mm-Lgals3-C2 (ACD,  
495 461471), Mm-Plat1-C1 (ACD, 557941), Mm-Ly6d-C1 (ACD, 532071), Mm-Cxcl14-C3 (ACD, 459741),  
496 Mm-Ndnf-C2 (ACD, 447471), Mm-Pthlh-C3 (ACD, 456521), Mm-Cd74-C1 (ACD, 437501), 3-plex  
497 Positive Control Probe-Mm (ACD, PN 320881) and 3-plex Negative Control Probe (ACD, PN 320891).  
498 Complete details of RNAscope probes used here are provided in Key Resources Table 1.

## 499 **Microscopy and image acquisition**

500 3D imaging: Images were acquired using a LSM780 or LSM880 inverted laser scanning confocal  
501 microscope (Carl Zeiss) equipped with 25x/0,8 OIL LD LCI PL APO or 40x/1,3 OIL DICII PL APO. For  
502 standard 4-color imaging, laser power and gain were adjusted manually to give optimal fluorescence  
503 for each fluorophore with minimal photobleaching. Images were captured using the ZEN Imaging  
504 Software and processed in Fiji (ImageJ v1.53).

505 smRNA-FISH: images were acquired using a LSM880 with an Airyscan system. The Airyscan system  
506 has 32-channel GaAsP (Gallium Arsenide Phosphide) detectors, which allow to obtain images with  
507 enhanced spatial resolution and improved signal-to-noise ratio (SNR) than in traditional LSM systems  
508 (Huff, 2015). A 63x/1,4 OIL DICII PL APO objective was used. Images were processed in Fiji (ImageJ  
509 v1.53).

510 Live-imaging: time-lapse images were acquired using an LSM780 or LSM880 inverted laser scanning  
511 confocal microscope (Carl Zeiss) equipped with 10x/0,3 DIC I EC PL NEOFLUAR, for imaging at the  
512 tissue scale. Explants were cultured in a humidified chamber at 37°C with 5% CO<sub>2</sub> during the course  
513 of imaging. To analyze branching morphogenesis in embryonic mammary buds, images were  
514 acquired at 8 mm Z intervals over approximately 80 mm thickness and 60 min intervals for 12-48 hr.

## 515 **Single cell dissociation of embryonic mammary gland**

516 The isolated embryonic mammary rudiments include both the mammary epithelium and the  
517 surrounding mesenchyme. 60-90 mammary rudiments were dissected for each experiment from 7-12  
518 female embryos derived from 2-4 timed pregnant females. The scRNA-seq of each developmental  
519 time was performed in a separate dissection session to maximize the number of mammary buds  
520 analyzed/timepoint.

521 Embryonic mammary buds along with their surrounding mesenchyme were dissected as detailed  
522 above (see *Embryonic mammary gland dissection and ex vivo culture* section). Single cell dissociation  
523 was performed as previously described (Wuidart et al., 2018) with the following modifications:

524 - for mammary rudiments at E13.5, E14.5 and E15.5, single cell dissociation was performed through  
525 enzymatic digestion with 300 U/ml collagenase A (Roche, 10103586001) and 300 U/ml hyaluronidase  
526 (Sigma, H3884) for 90 minutes at 37°C under shaking. Mammary rudiments from each female embryo  
527 were dissociated in a separated 2 mL protein LoBind tube (Eppendorf, 022431102). Cells were further

528 treated with 0.1 mg/ml DNase I (Sigma, D4527) for 3 minutes. 10% FBS diluted in PBS was added to  
529 quench the DNase I. Cells were pelleted by centrifugation at 320 g for 10 minutes.

530 - for mammary glands at birth, the enzymatic digestion for single cell dissociation was optimized as  
531 followed. 600 U/ml collagenase A (Roche, 10103586001) and 150 U/ml hyaluronidase (Sigma,  
532 H3884) for 90 minutes at 37°C under shaking were used for enzymatic digestion. Cells were further  
533 treated with 0.1 mg/ml DNase I (Sigma, D4527) for 3 minutes and an additional incubation in 0.63%  
534 NH<sub>4</sub>Cl for 1 minute allowed lysis of red blood cells. Cells were pelleted by centrifugation at 320 g for  
535 10 minutes.

536 For all developmental times, after careful removal of the supernatant, cells were incubated in  
537 fluorescently labelled primary antibodies.

### 538 **Cell labelling, flow cytometry and sorting**

539 Single cell suspensions were incubated for 15 minutes on ice with fluorescently labelled primary  
540 antibodies diluted in HBSS with 2% FBS. Cells were washed from unbound antibodies with 2% FBS  
541 in HBSS and the cell suspension was passed through a 40 µm cell strainer filter to eliminate cell  
542 clumps.

543 Cell viability was determined with DAPI and doublets were systematically excluded during analysis.  
544 CD45<sup>+</sup>, CD31<sup>+</sup>, Ter119<sup>+</sup> (Lin<sup>+</sup>) non-epithelial cells were excluded. FACS analysis was performed using  
545 an ARIA flow cytometer (BD).

546 The following primary antibodies were used at a 1:100 dilution: APC anti-mouse CD31 (Biolegend,  
547 102510), APC anti-mouse Ter119 (Biolegend, 116212), APC anti-mouse CD45 (Biolegend, 103112),  
548 APC/Cy7 anti-mouse CD49f (Biolegend, 313628), and PE anti-mouse EpCAM (Biolegend, 118206).  
549 The isotype controls were the following: PE rat IgM (Biolegend, 400808), PE/Cy7 rat IgG2a  
550 (Biolegend, 400522), APC/Cy7 rat IgG2a (Biolegend, 400524) and APC rat IgG2b (Biolegend,  
551 400612). Complete details of the antibodies used are provided in the Key Resources Table 1. The  
552 results were analyzed using the FlowJo software (V10.0.7).

### 553 **Image analysis and quantification**

554 For time-lapse live imaging analysis, first time-lapse reconstructions were generated using the Bio-  
555 Formats plugin (Linkert et al., 2010) in Fiji (ImageJ v1.53). Then, automated segmentation of  
556 mammary buds was performed using a custom-made segmentation model based on U-Net  
557 (Ronneberger et al., 2015). Segmented masks and raw image were input in the ImageJ plugin,  
558 BTrack, for tracking the growing branch tips. BTrack allows the users to remove or create new end  
559 points to manually correct the obtained tracks. We obtained the average growth rate for each branch



560 using customized Python scripts (see Data and code availability). Statistical analyses were performed  
561 in Prism (v9.2, GraphPad).

562 To determine bud surface area in the presence of FGF10 in the medium, segmented masks were  
563 obtained from each timepoint using the U-Net model previously described. Generated masks were  
564 manually checked and corrected against raw data for consistency prior to extracting area  
565 measurements. Surface area was measure for each timepoint and statistical analyses were  
566 performed in Prism (v9.2, GraphPad).

567 For smRNA-FISH dot counting, the Find Maxima tool in Fiji (ImageJ v1.53) was used to find the  
568 highest peak values in the images using a previously specified threshold. Then, a custom ImageJ  
569 macro was coded to create 3 parallel regions of interest (ROIs) with a ring-shaped surface. Finally,  
570 the number of dots in each ROI was calculated for each smRNA-FISH probe. The percentage of dots  
571 in each ring was calculated as the ratio of number of dots in a specific ROI to the total number of dots  
572 in the 3 ROIs (outer, middle and internal ring). Statistical analysis was performed in Prism (v9.2,  
573 GraphPad).

574 For EdU quantification 3 independent explants in each condition were analyzed. For each explant,  
575 independent regions of interest were randomly selected in discrete Z-slides. The mammary epithelium  
576 was outlined manually in Fiji using the tdTomato or luminal lineage marker staining as a guide (ImageJ  
577 v1.53). Hoechst images were processed with a median filter (1-2px). StarDist (Schmidt et al., 2018;  
578 Weigert et al., 2020) was used to segment and quantify number of Nuclei and EdU<sup>+</sup> nuclei within the  
579 outlined mammary epithelial tree region in Fiji (ImageJ v1.53). EdU<sup>+</sup> nuclei were expressed as a  
580 percentage over total number of nuclei. Statistical analysis was performed in Prism (v9.2, GraphPad).

### 581 **scRNA-seq data processing and cluster analysis**

582 Single cell capture and library construction were performed using the 10x Genomics Chromium Single  
583 Cell 3' v3.1 kit following the manufacturer's instructions, for samples of different developmental  
584 stages. The libraries were sequenced with an Illumina NovaSeq 6000 sequencer by the *Next*  
585 *Generation Sequencing* platform of Institut Curie.

586 Data pre-processing and quality control: The 10x Genomics Cell Ranger Single-Cell Software Suite  
587 was used for demultiplexing, read alignment and unique molecular identifier (UMI) quantification  
588 (<http://software.10xgenomics.com/single-cell/overview/welcome>). The pre-built mm10 reference  
589 genome obtained from the 10X Genomics website was used to align the reads. Then, the count  
590 matrices were individually loaded for each sample in R and analyzed using the Seurat package v4.0.5  
591 (Hao et al., 2021).

592 Genes expressed in less than 3 cells and cells with UMI count < 5000 and mitochondrial UMI count  
593 > 6% were removed. This resulted in the following total number of high-quality cells: 228 at E13.5, 59  
594 at E14.5, 740 at E15.5, 409 at P0 in WT mice.

595 Normalization: Objects were normalized separately using the SCTransform method, implemented in  
596 the “SCTransform” function from Seurat. Briefly, this method regresses out the sequencing depth  
597 variation between cells using a negative binomial regression model with regularized parameters  
598 (Hafemeister & Satija, 2019).

599 scRNA-seq data dimension reduction and clustering: Principal Component Analysis (PCA) was  
600 performed on the top 2000 highly variable genes of the SCT assay from the “SCTransform” step. The  
601 top 15 principal components (PCs) were further selected (based on inspection of PC elbow plot) to  
602 perform graph-based clustering and cell cluster detection. All the Uniform Manifold Approximation  
603 and Projection (UMAP) plots (McInnes et al., 2018) were computed using the “RunUMAP” Seurat  
604 function with default Seurat parameters.

605 Cell cluster identification: Cell clustering was performed using a two-step wise approach, using the  
606 “FindNeighbors” and “FindClusters” functions, respectively. The “FindClusters” function was used to  
607 set the resolution parameter to 0.8.

608 Differential expression analysis: Cell-type marker genes for each cluster were identified using the  
609 function “FindAllMarkers” function in Seurat, with detected in minimum cell fraction > 10% and log-  
610 fold change > 0.1. Then, cell clusters were manually annotated based on cell type specific markers  
611 that are known to be enriched in each cell population. Cell proliferative clusters were identified by  
612 using the following list of genes: 'Pclaf', 'Ncapg2', 'Smc2', 'Tyms', 'Tuba1b', 'Hmgb2', 'Top2a', 'Tacc3',  
613 'Cenph', 'Cdk1', 'Tubb5', 'Diaph3', 'Cenpf', in order to compute an expression score using the Seurat  
614 function ‘AddModuleScore’.

615 Signature construction: a single-cell ID score for “basal-like” and “luminal-like” cells was calculated  
616 based on previously published transcriptomic analyses of adult MECs (Kendrick et al., 2008). The  
617 scores were computed using the Seurat function “AddModuleScore”.

618 3D trajectory and pseudotime analysis: For this analysis, only the epithelial cell clusters from E13.5,  
619 E14.5, E15.5, and P0 were considered. The pre-processing steps previously described were re-  
620 applied (normalization, PCA, and basal and luminal score). Epithelial cells were then mapped in a 3D  
621 space including the luminal score and basal score on the x-axis and the PC related to developmental  
622 time on the y-axis. For each cell cluster, the coordinates of the center in the 3D space with the median  
623 for each dimension were calculated and called “pseudo-bulks”. A minimum spanning tree (MST) was  
624 generated to connect all pseudo-bulks. Basal and luminal trajectories were inferred through the MST.

625 To get the pseudotime of each cell along the basal or luminal trajectories, each cell was projected in  
626 the 3D space to the basal and luminal trajectories separately. Then, the pseudotime for each cell was  
627 defined as their distance from the initial point of the trajectory.

628 The luminal and basal gene expression heatmap was generated on the pseudotime with the  
629 “pheatmap” package. Briefly, the genes with the top 10% variation across cells within a lineage were  
630 selected. The gene expression values were smoothed versus the pseudotime using the generalized  
631 additive model (GAM). The hierarchical gene clusters were generated with Euclidean distance and  
632 Complete clustering algorithm.

633 Cell-cell interaction analysis: The cell-cell interaction analysis was performed using the CellPhoneDB  
634 version 3.0.0 (Vento-Tormo et al., 2018) with a p-value threshold of 0.01. The CellPhoneDB database  
635 is publicly available at <https://www.cellphonedb.org/>. It is a curated database of ligand-receptor  
636 interactions that allow to predict cell-cell interactions in transcriptomic data. CellPhoneDB was used  
637 on our scRNA-seq E15.5 dataset between both mesenchymal clusters (sub-epithelial cluster and  
638 dermal mesenchyme cluster) against the basal-like epithelial cell cluster.

### 639 **Statistics and Reproducibility**

640 At least n=3 animals were used for each experiment, and experiments with at least n=3 replicates  
641 were used to calculate the statistical significance of each analysis. Statistical tests and further graphs  
642 were prepared in Prism (v9, GraphPad). All graphs show mean  $\pm$  SEM. Differences between groups  
643 were assessed with two-tailed unpaired T-test with Welch’s correction. Statistical analyses between  
644 the localization of two RNA probes were assessed with two-way ANOVA test. The significance  
645 threshold was  $p < 0.05$ . \* indicates  $p < 0.05$ , \*\* indicates  $p < 0.01$ , \*\*\* indicates  $p < 0.001$ , and \*\*\*\*  
646 indicates  $p < 0.0001$ .

### 647 **Data and software availability**

648 Customized scripts and instructions are available from Github: [https://github.com/Fre-Team-](https://github.com/Fre-Team-Curie/Embryo-mammary-gland)  
649 [Curie/Embryo-mammary-gland](https://github.com/Fre-Team-Curie/Embryo-mammary-gland).

650 The single cell RNA sequencing data have been deposited in NCBI's Gene Expression Omnibus  
651 (GEO) repository and are accessible through GEO Series accession number GSE210594. All other  
652 data supporting the conclusions of this study are provided in the main text or the supplementary  
653 materials.

654



655 **Key Resource Table 1. Reagents and materials**

| Reagent                                                      | Source                              | Identifier   |
|--------------------------------------------------------------|-------------------------------------|--------------|
| <b>Chemicals, peptides and recombinant proteins</b>          |                                     |              |
| Triton X-100                                                 | Euromedex                           | 2000-C       |
| Paraformaldehyde                                             | Electron Microscopy Sciences        | 15710        |
| Sucrose                                                      | Sigma                               | S0389        |
| DMEM/F12                                                     | Gibco-Thermo Fisher Scientific      | 21331020     |
| Collagenase A                                                | Roche                               | 10103586001  |
| Hyaluronidase                                                | Sigma-Aldrich                       | H3884        |
| DNAse I                                                      | Sigma-Aldrich                       | D4527        |
| Aqua-Polymount                                               | Polysciences                        | 18606        |
| ProLong Diamond Antifade Mountant                            | Invitrogen-Thermo Fisher Scientific | P36930       |
| Recombinant Mouse FGF-10 Protein                             | Bio-technie                         | 6224-FG      |
| Pancreatin from porcine pancreas                             | Sigma-Aldrich                       | P3292        |
| Porcine Trypsin                                              | Sigma-Aldrich                       | 85450C       |
| Dispase II                                                   | Roche                               | 04942078001  |
| Ascorbic Acid                                                | Sigma-Aldrich                       | A4544        |
| GlutaMAX™                                                    | Gibco-Thermo Fisher Scientific      | 35050-038    |
| Fetal Bovine Serum                                           | Gibco                               | 10500064     |
| Penicillin-Streptomycin                                      | Sigma-Aldrich                       | P4333        |
| NaCl                                                         | Sigma-Aldrich                       | S5886        |
| KCl                                                          | Sigma-Aldrich                       | P5405        |
| NaH <sub>2</sub> PO <sub>4</sub>                             | Sigma-Aldrich                       | S3522        |
| D-(+)-Glucose                                                | Sigma-Aldrich                       | G7021        |
| NaHCO <sub>3</sub>                                           | Sigma-Aldrich                       | S5761        |
| Tissue-Tek O.C.T.                                            | Sakura                              | 4583         |
| <b>Critical Commercial assays</b>                            |                                     |              |
| Click-IT EdU Alexa Fluor 647 imaging kit                     | Invitrogen-Thermo Fisher Scientific | C10640       |
| RNAscope Multiplex Fluorescent Detection Kit v2 kit          | ACD                                 | 32310        |
| RNAscope H <sub>2</sub> O <sub>2</sub> and protease reagents | ACD                                 | 322381       |
| RNAscope Target Retrieval Reagent                            | ACD                                 | 322000       |
| RNAscope TSA buffer pack                                     | ACD                                 | 322810       |
| RNAscope Probe Diluent                                       | ACD                                 | 300041       |
| TSA PLUS CYANINE 3                                           | Akoya biosciences                   | NEL744001KT  |
| TSA PLUS CYANINE 5                                           | Akoya biosciences                   | NEL705A001KT |

|                                            |                   |             |
|--------------------------------------------|-------------------|-------------|
| TSA PLUS FLUORESCEIN                       | Akoya biosciences | NEL741001KT |
| RNAscope® Probe- Mm-Anxa1-C2               | ACD               | 509291      |
| RNAscope® Probe- Mm-Lgals3-C2              | ACD               | 461471      |
| RNAscope® Probe- Mm-Plet1                  | ACD               | 557941      |
| RNAscope® Probe- Mm-Ly6d                   | ACD               | 532071      |
| RNAscope® Probe- Mm-Cxcl14-C3              | ACD               | 459741      |
| RNAscope® Probe- Mm-Ndnf-C2                | ACD               | 447471      |
| RNAscope® Probe- Mm-Pthlh-C3               | ACD               | 456521      |
| RNAscope® Probe- Mm-Cd74                   | ACD               | 437501      |
| RNAscope® 3-plex Positive Control Probe_Mm | ACD               | 320881      |
| RNAscope® 3-plex Negative Control Probe    | ACD               | 320871      |
| <b>Others</b>                              |                   |             |
| 35mm glass bottom dishes                   | Fluorodish        | 81158       |
| Cell culture inserts                       | Millicell         | PICM0RG50   |

656

657 **Key Resource Table 2. Antibodies**

| Reagent                                                                         | Source                                                   | Identifier                                                                                |
|---------------------------------------------------------------------------------|----------------------------------------------------------|-------------------------------------------------------------------------------------------|
| <b>Antibodies</b>                                                               |                                                          |                                                                                           |
| Rabbit anti-SMA                                                                 | Abcam                                                    | Cat# ab5694; RRID: AB_2223021                                                             |
| Rat anti-K8                                                                     | Developmental Studies Hybridoma Bank, University of Iowa | Cat# TROMA-I; RRID: AB_531826                                                             |
| Mouse anti-p63                                                                  | Abcam                                                    | Cat# ab735; RRID:AB_305870                                                                |
| Rabbit anti-K5                                                                  | Covance                                                  | Cat# PRB-160P-100; RRID:AB_291581                                                         |
| Rabbit anti-K14                                                                 | Abcam                                                    | Cat# ab181595, RRID:AB_2811031                                                            |
| Mouse anti-ERalpha                                                              | Agilent-Dako                                             | Cat# M7047, RRID:AB_2101946                                                               |
| Rat anti-ZO-1                                                                   | Millipore                                                | Cat# MABT11, RRID:AB_10616098                                                             |
| anti-PLAG1                                                                      | (Spengler et al., 1997)                                  | N/A                                                                                       |
| Goat anti-rabbit AlexaFluor-coupled to different fluorochromes (Cy3, Cy5, A488) | Invitrogen-Thermo Fisher Scientific                      | Cat# A10520; RRID:AB_2534029 Cat# A10523; RRID:AB_2534032, Cat# A-11034; RRID:AB_2576217  |
| Goat anti-rat AlexaFluor-coupled to                                             | Invitrogen-Thermo Fisher Scientific                      | Cat# A10522; RRID:AB_2534031, Cat# A10525; RRID:AB_2534034, Cat# A-11006; RRID:AB_2534074 |

|                                                                                |                                     |                                                                                          |
|--------------------------------------------------------------------------------|-------------------------------------|------------------------------------------------------------------------------------------|
| different fluorochromes (Cy3, Cy5, A488)                                       |                                     |                                                                                          |
| Goat anti-mouse AlexaFluor-coupled to different fluorochromes (Cy3, Cy5, A488) | Invitrogen-Thermo Fisher Scientific | Cat# A10521; RRID:AB_2534030, Cat# A10524; RRID:AB_2534033 Cat# A-11001; RRID:AB_2534069 |
| Goat anti-chicken AlexaFluor- 488                                              | Invitrogen-Thermo Fisher Scientific | Cat# 400612, RRID:AB_326556                                                              |
| PE anti-mouse Epcam                                                            | Biologend                           | Cat# 118206, RRID:AB_1134176                                                             |
| APC/Cy7 anti-mouse CD49f                                                       | Biologend                           | Cat# 313628; RRID:AB_2616784                                                             |
| APC anti-mouse CD31                                                            | Biologend                           | Cat# 102510; RRID:AB_312905                                                              |
| APC anti-mouse Ter119                                                          | Biologend                           | Cat# 116212; RRID:AB_313713                                                              |
| APC anti-mouse CD45                                                            | Biologend                           | Cat# 103112, RRID:AB_312977                                                              |
| PE rat IgM                                                                     | Biologend                           | Cat# 400808; RRID:AB_326584                                                              |
| APC/Cy7 rat IgG2a                                                              | Biologend                           | Cat# 400524                                                                              |
| APC rat IgG2b                                                                  | Biologend                           | Cat# 400612, RRID:AB_326556                                                              |

658

## 659 **Acknowledgements**

660 The authors thank S. Tajbakhsh for the mTmG reporter line. We acknowledge the flow cytometry and  
661 cell sorting platform at Institut Curie for their technical support, the in vivo experimental facility for  
662 help in the maintenance and care of mouse colonies, the ICGex NGS platform of Institut Curie  
663 (supported by grants ANR-10-EQPX-03, Equipex and ANR-10-INBS-09-08, France Génomique  
664 Consortium, from the Agence Nationale de la Recherche "Investissements d'Avenir" program, by the  
665 Canceropole Ile-de-France and by the SiRIC-Curie program - SiRIC Grant INCa-DGOS- 4654), the  
666 Cell and Tissue Imaging Platform-PICT-IBISA (member of France-Bioimaging, ANR-10-INBS-04) of  
667 the Genetics and Developmental Biology Department (UMR3215/U934) for their expertise. The  
668 authors specially thank Olivier Leroy and Anne-Sophie Mace for image analysis support. We are  
669 grateful to members of the Fre laboratory for support and constructive discussions. This work was  
670 supported by Paris Sciences et Lettres (PSL\* Research University) (grant # C19-64-2019-228), the  
671 French National Research Agency (ANR) grant numbers ANR-15-CE13-0013-01 and ANR-21-CE13-  
672 0047, the Medical Research Foundation FRM "FRM Equipes" EQU201903007821, the FSER  
673 (Fondation Schlumberger pour l'éducation et la recherche) FSER20200211117 and by Labex DEEP  
674 ANR-Number 11-LBX-0044 to S.F. C.C. was funded by the European Union's Horizon 2020 research  
675 and innovation program under the Marie Skłodowska-Curie grant agreement No 666003 for PhD  
676 fellowships and the Medical Research Foundation FRM Project 12917. B.L.-L. is funded by a Vice-  
677 Chancellor's Research Fellowship from the University of Bristol and acknowledges support from the

678 Academy of Medical Sciences/Wellcome Trust/the Government Department of Business, Energy and  
679 Industrial Strategy/British Heart Foundation/Diabetes UK Springboard Award [SBF003/1170],  
680 Elizabeth Blackwell Institute for Health Research (University of Bristol), and Wellcome Trust  
681 Institutional Strategic Support Fund (204813/Z/16/Z).

682 The funders had no role in study design, data collection and analysis, decision to publish, or  
683 preparation of the manuscript.

684

## 685 **Author Contributions**

686 C.C., B.L.-L., M.M.F., and S.F. conceived and designed the experiments. C.C., M.P. and M.M.F.  
687 performed all experiments. C.C., W.S. and R.J. performed the scRNA-seq data analysis. C.C., B.L.-  
688 L., V.K. and F.H. performed image analysis. C.C. and V.K. developed the image analysis pipeline.  
689 C.C., B.L.-L., M.M.F., and S.F. wrote the manuscript. All authors reviewed and approved the  
690 manuscript.

691

## 692 **Conflict of interest**

693 All authors declare no competing interests.

694

## 695 **References**

- 696 Blaas, L., Pucci, F., Messal, H. A., Andersson, A. B., Ruiz, E. J., Gerling, M., Douagi, I., Spencer-  
697 Dene, B., Musch, A., Mitter, R., Bhaw, L., Stone, R., Bornhorst, D., Sesay, A. K., Jonkers, J.,  
698 Stamp, G., Malanchi, I., Toftgard, R., & Behrens, A. (2016). Lgr6 labels a rare population of  
699 mammary gland progenitor cells that are able to originate luminal mammary tumours. *Nature*  
700 *Cell Biology*, 18(12), 1346–1356. <https://doi.org/10.1038/ncb3434>
- 701 Buechler, M. B., Pradhan, R. N., Krishnamurty, A. T., Cox, C., Calviello, A. K., Wang, A. W., Yang,  
702 Y. A., Tam, L., Caothien, R., Roose-Girma, M., Modrusan, Z., Arron, J. R., Bourgon, R., Müller,  
703 S., & Turley, S. J. (2021). Cross-tissue organization of the fibroblast lineage. *Nature*,  
704 593(7860), 575–579. <https://doi.org/10.1038/s41586-021-03549-5>
- 705 Carabaña, C., & Lloyd-Lewis, B. (2022). Multidimensional Fluorescence Imaging of Embryonic and  
706 Postnatal Mammary Gland Development. In Vivanco MM (Ed.), *Methods Mol Biol* (Second,  
707 Vol. 2471, pp. 19–48). [https://doi.org/10.1007/978-1-0716-2193-6\\_2](https://doi.org/10.1007/978-1-0716-2193-6_2)
- 708 Chan, C. J., Heisenberg, C. P., & Hiiragi, T. (2017). Coordination of Morphogenesis and Cell-Fate  
709 Specification in Development. *Current Biology*, 27(18), R1024–R1035.  
710 <https://doi.org/10.1016/j.cub.2017.07.010>
- 711 Chung, C.-Y., Ma, Z., Dravis, C., Preissl, S., Poirion, O., Luna, G., Hou, X., Girardi, R. R., Ren, B.,  
712 & Wahl, G. M. (2019). Single-Cell Chromatin Analysis of Mammary Gland Development  
713 Reveals Cell-State Transcriptional Regulators and Lineage Relationships. *Cell Rep*, 29(2),  
714 495–510. <https://doi.org/10.1016/j.celrep.2019.08.089>
- 715 Davis, F. M., Lloyd-Lewis, B., Harris, O. B., Kozar, S., Winton, D. J., Muresan, L., & Watson, C. J.  
716 (2016). Single-cell lineage tracing in the mammary gland reveals stochastic clonal dispersion of

- 717 stem/progenitor cell progeny. *Nature Communications*, 7(13053).  
718 <https://doi.org/10.1038/ncomms13053>
- 719 dos Santos, C. O., Rebbeck, C., Rozhkova, E., Valentine, A., Samuels, A., Kadiri, L. R., Osten, P.,  
720 Harris, E. Y., Uren, P. J., Smith, A. D., & Hannon, G. J. (2013). Molecular hierarchy of  
721 mammary differentiation yields refined markers of mammary stem cells. *Proceedings of the*  
722 *National Academy of Sciences of the United States of America*, 110(18), 7123–7130.  
723 <https://doi.org/10.1073/pnas.1303919110>
- 724 Fankhaenel, M., Sadat Golestan Hashemi, F., Mosa Hosawi, M., Mourao, L., Skipp, P., Morin, X.,  
725 LGJ Scheele, C., & Elias, S. (2021). Annexin A1 is a polarity cue that directs planar mitotic  
726 spindle orientation during mammalian epithelial morphogenesis. *BioRxiv*, 454117.  
727 <https://doi.org/10.1101/2021.07.28.454117>
- 728 Girardi, R. R., Chung, C.-Y., Heinz, R. E., Balcioglu, O., Novotny, M., Trejo, C. L., Dravis, C.,  
729 Hagos, B. M., Mehrabad, E. M., Rodewald, L. W., Hwang, J. Y., Fan, C., Lasken, R., Varley, K.  
730 E., Perou, C. M., Wahl, G. M., & Spike, B. T. (2018). Single-Cell Transcriptomes Distinguish  
731 Stem Cell State Changes and Lineage Specification Programs in Early Mammary Gland  
732 Development. *Cell Rep*, 24(6), 1653–1666. <https://doi.org/10.1016/j.celrep.2018.07.025>
- 733 Hafemeister, C., & Satija, R. (2019). Normalization and variance stabilization of single-cell RNA-seq  
734 data using regularized negative binomial regression. *Genome Biology*, 20(1).  
735 <https://doi.org/10.1186/s13059-019-1874-1>
- 736 Hannezo, E., Scheele, C. L. G. J., Moad, M., Drogo, N., Heer, R., Sampogna, Rosemary. V., van  
737 Rheenen, J., & Simons, B. D. (2017). A Unifying Theory of Branching Morphogenesis. *Cell*,  
738 171(1), 242-255.e27. <https://doi.org/10.1016/j.cell.2017.08.026>
- 739 Hao, Y., Hao, S., Andersen-Nissen, E., Mauck, W. M., Zheng, S., Butler, A., Lee, M. J., Wilk, A. J.,  
740 Darby, C., Zager, M., Hoffman, P., Stoeckius, M., Papalexi, E., Mimitou, E. P., Jain, J.,  
741 Srivastava, A., Stuart, T., Fleming, L. M., Yeung, B., ... Satija, R. (2021). Integrated analysis of  
742 multimodal single-cell data. *Cell*, 184(13), 3573-3587.e29.  
743 <https://doi.org/10.1016/j.cell.2021.04.048>
- 744 Huff, J. (2015). The Airyscan detector from ZEISS: confocal imaging with improved signal-to-noise  
745 ratio and super-resolution. *Nature Methods*, 12(12), i–ii. <https://doi.org/10.1038/nmeth.f.388>
- 746 Inman, J. L., Robertson, C., Mott, J. D., & Bissell, M. J. (2015). Mammary gland development: Cell  
747 fate specification, stem cells and the microenvironment. *Development*, 142(6), 1028–1042.  
748 <https://doi.org/10.1242/dev.087643>
- 749 Kendrick, H., Regan, J. L., Magnay, F. A., Grigoriadis, A., Mitsopoulos, C., Zvelebil, M., & Smalley,  
750 M. J. (2008). Transcriptome analysis of mammary epithelial subpopulations identifies novel  
751 determinants of lineage commitment and cell fate. *BMC Genomics*, 9, 591.  
752 <https://doi.org/10.1186/1471-2164-9-591>
- 753 Lan, Q., & Mikkola, M. L. (2020). Protocol: Adeno-Associated Virus-Mediated Gene Transfer in Ex  
754 Vivo Cultured Embryonic Mammary Gland. *Journal of Mammary Gland Biology and Neoplasia*,  
755 25(4), 409–416. <https://doi.org/10.1007/s10911-020-09461-4>
- 756 Lilja, A. M., Rodilla, V., Huyghe, M., Hannezo, E., Landragin, C., Renaud, O., Leroy, O., Rulands,  
757 S., Simons, B. D., & Fre, S. (2018). Clonal analysis of Notch1-expressing cells reveals the  
758 existence of unipotent stem cells that retain long-term plasticity in the embryonic mammary  
759 gland. *Nature Cell Biology*, 20(6), 677–687. <https://doi.org/10.1038/s41556-018-0108-1>
- 760 Linkert, M., Rueden, C. T., Allan, C., Burel, J. M., Moore, W., Patterson, A., Loranger, B., Moore, J.,  
761 Neves, C., MacDonald, D., Tarkowska, A., Sticco, C., Hill, E., Rossner, M., Eliceiri, K. W., &  
762 Swedlow, J. R. (2010). Metadata matters: Access to image data in the real world. *Journal of*  
763 *Cell Biology*, 189(5), 777–782. <https://doi.org/10.1083/jcb.201004104>
- 764 Lloyd-Lewis, B., Davis, F. M., Harris, O. B., Hitchcock, J. R., & Watson, C. J. (2018). Neutral lineage  
765 tracing of proliferative embryonic and adultmammary stem/progenitor cells. *Development*  
766 *(Cambridge)*, 145(14). <https://doi.org/10.1242/dev.164079>
- 767 Mailleux, A., Spencer-Dene, B., Dillon, C., Ndiaye, D., Savona-Baron, C., Itoh, N., Kato, S.,  
768 Dickson, C., Thiery, J., & Bellusci, S. (2002). Role of FGF10/FGFR2b signaling during  
769 mammary gland development in the mouse embryo. *Development*, 129(1), 53–60.  
770 <https://doi.org/10.1242/dev.129.1.53>



- 771 McInnes, L., Healy, J., & Melville, J. (2018). *UMAP: Uniform Manifold Approximation and Projection*  
772 *for Dimension Reduction*. <http://arxiv.org/abs/1802.03426>
- 773 Merrick, D., Sakers, A., Irgebay, Z., Okada, C., Calvert, C., Morley, M. P., Percec, I., & Seale, P.  
774 (2019). Identification of a mesenchymal progenitor cell hierarchy in adipose tissue. *Science*,  
775 364(6438). <https://doi.org/10.1126/science.aav2501>
- 776 Miller, D. J., & Fort, P. E. (2018). Heat shock proteins regulatory role in neurodevelopment.  
777 *Frontiers in Neuroscience*, 12(821). <https://doi.org/10.3389/fnins.2018.00821>
- 778 Muzumdar, M. D., Tasic, B., Miyamichi, K., Li, N., & Luo, L. (2007). A global double-fluorescent cre  
779 reporter mouse. *Genesis*, 45(9), 593–605. <https://doi.org/10.1002/dvg.20335>
- 780 Pal, B., Chen, Y., Milevskiy, M. J. G., Vaillant, F., Prokopuk, L., Dawson, C. A., Capaldo, B. D.,  
781 Song, X., Jackling, F., Timpson, P., Lindeman, G. J., Smyth, G. K., & Visvader, J. E. (2021).  
782 Single cell transcriptome atlas of mouse mammary epithelial cells across development. *Breast*  
783 *Cancer Research*, 23(1). <https://doi.org/10.1186/s13058-021-01445-4>
- 784 Prater, M. D., Petit, V., Alasdair Russell, I., Girardi, R. R., Shehata, M., Menon, S., Schulte, R.,  
785 Kalajzic, I., Rath, N., Olson, M. F., Metzger, D., Faraldo, M. M., Deugnier, M. A., Glukhova, M.  
786 A., & Stingl, J. (2014). Mammary stem cells have myoepithelial cell properties. *Nature Cell*  
787 *Biology*, 16(10), 942–950. <https://doi.org/10.1038/ncb3025>
- 788 Ronneberger, O., Fischer, P., & Brox, T. (2015). *U-Net: Convolutional Networks for Biomedical*  
789 *Image Segmentation*. <http://arxiv.org/abs/1505.04597>
- 790 Scheele, C. L. G. J., Hannezo, E., Muraro, M. J., Zomer, A., Langedijk, N. S. M., van Oudenaarden,  
791 A., Simons, B. D., & van Rheenen, J. (2017). Identity and dynamics of mammary stem cells  
792 during branching morphogenesis. *Nature*, 542(7641), 313–317.  
793 <https://doi.org/10.1038/nature21046>
- 794 Schmidt, U., Weigert, M., Broaddus, C., & Myers, G. (2018). Cell Detection with Star-convex  
795 Polygons. *International Conference on Medical Image Computing and Computer-Assisted*  
796 *Intervention (MICCAI)*. [https://doi.org/10.1007/978-3-030-00934-2\\_30](https://doi.org/10.1007/978-3-030-00934-2_30)
- 797 Sjöberg, E., Augsten, M., Bergh, J., Jirström, K., & Östman, A. (2016). Expression of the chemokine  
798 CXCL14 in the tumour stroma is an independent marker of survival in breast cancer. *British*  
799 *Journal of Cancer*, 114(10), 1117–1124. <https://doi.org/10.1038/bjc.2016.104>
- 800 Spengler, D., Villalba, M., Hoffmann, A., Pantaloni, C., Houssami, S., Bockaert, J., & Journot, L.  
801 (1997). Regulation of apoptosis and cell cycle arrest by Zac1, a novel zinc finger protein  
802 expressed in the pituitary gland and the brain. *The EMBO Journal*, 16(10), 2814–2825.  
803 <https://doi.org/10.1093/emboj/16.10.2814>
- 804 Spina, E., & Cowin, P. (2021). Embryonic mammary gland development. *Seminars in Cell and*  
805 *Developmental Biology*, 114, 83–92. <https://doi.org/10.1016/j.semcd.2020.12.012>
- 806 Stuart, T., Butler, A., Hoffman, P., Hafemeister, C., Papalexi, E., Mauck, W. M., Hao, Y., Stoeckius,  
807 M., Smibert, P., & Satija, R. (2019). Comprehensive Integration of Single-Cell Data. *Cell*,  
808 177(7), 1888–1902.e21. <https://doi.org/10.1016/j.cell.2019.05.031>
- 809 Tsang, S. M., Kim, H., Oliemuller, E., Newman, R., Boateng, N. A., Guppy, N., & Howard, B. A.  
810 (2021). Sox11 regulates mammary tumour-initiating and metastatic capacity in Brca1-deficient  
811 mouse mammary tumour cells. *DMM Disease Models and Mechanisms*, 14(5).  
812 <https://doi.org/10.1242/DMM.046037>
- 813 van Amerongen, R., Bowman, A. N., & Nusse, R. (2012). Developmental stage and time dictate the  
814 fate of Wnt/β-catenin- responsive stem cells in the mammary gland. *Cell Stem Cell*, 11(3),  
815 387–400. <https://doi.org/10.1016/j.stem.2012.05.023>
- 816 van Keymeulen, A., Rocha, A. S., Ousset, M., Beck, B., Bouvencourt, G., Rock, J., Sharma, N.,  
817 Dekoninck, S., & Blanpain, C. (2011). Distinct stem cells contribute to mammary gland  
818 development and maintenance. *Nature*, 479(7372), 189–193.  
819 <https://doi.org/10.1038/nature10573>
- 820 Vento-Tormo, R., Efremova, M., Botting, R. A., Turco, M. Y., Vento-Tormo, M., Meyer, K. B., Park,  
821 J. E., Stephenson, E., Polański, K., Goncalves, A., Gardner, L., Holmqvist, S., Henriksson, J.,  
822 Zou, A., Sharkey, A. M., Millar, B., Innes, B., Wood, L., Wilbrey-Clark, A., ... Teichmann, S. A.  
823 (2018). Single-cell reconstruction of the early maternal–fetal interface in humans. *Nature*,  
824 563(7731), 347–353. <https://doi.org/10.1038/s41586-018-0698-6>

- 825 Voutilainen, M., Lindfors, P. H., & Mikkola, M. L. (2013). Protocol: Ex vivo culture of mouse  
826 embryonic mammary buds. *Journal of Mammary Gland Biology and Neoplasia*, 18(2), 239–  
827 245. <https://doi.org/10.1007/s10911-013-9288-2>
- 828 Wansbury, O., Mackay, A., Kogata, N., Mitsopoulos, C., Kendrick, H., Davidson, K., Ruhrberg, C.,  
829 Reis-Filho, J. S., Smalley, M. J., Zvelebil, M., & Howard, B. A. (2011). Transcriptome analysis  
830 of embryonic mammary cells reveals insights into mammary lineage establishment. *Breast  
831 Cancer Research*, 13(4). <https://doi.org/10.1186/bcr2928>
- 832 Watson, C. J., & Khaled, W. T. (2020). Mammary development in the embryo and adult: New  
833 insights into the journey of morphogenesis and commitment. *Development*, 147(22).  
834 <https://doi.org/10.1242/dev.169862>
- 835 Weigert, M., Schmidt, U., Haase, R., Sugawara, K., & Myers, G. (2020). Star-convex Polyhedra for  
836 3D Object Detection and Segmentation in Microscopy. *Proceedings of the IEEE/CVF Winter  
837 Conference on Applications of Computer Vision (WACV)*, 3666–3673.  
838 <https://doi.org/10.48550/arXiv.1908.03636>
- 839 Wuidart, A., Ousset, M., Rulands, S., Simons, B. D., van Keymeulen, A., & Blanpain, C. (2016).  
840 Quantitative lineage tracing strategies to resolve multipotency in tissue-specific stem cells.  
841 *Genes Dev*, 30(11), 1261–1277. <https://doi.org/10.1101/gad.280057.116>
- 842 Wuidart, A., Sifrim, A., Fioramonti, M., Matsumura, S., Brisebarre, A., Brown, D., Centonze, A.,  
843 Dannau, A., Dubois, C., van Keymeulen, A., Voet, T., & Blanpain, C. (2018). Early lineage  
844 segregation of multipotent embryonic mammary gland progenitors. *Nature Cell Biology*, 20(6),  
845 666–676. <https://doi.org/10.1038/s41556-018-0095-2>

846

847

Figure 1. Developmental atlas of the transcriptional signatures and 3D trajectory analysis of luminal and basal differentiation of single mammary epithelial cells from E13.5 until birth.

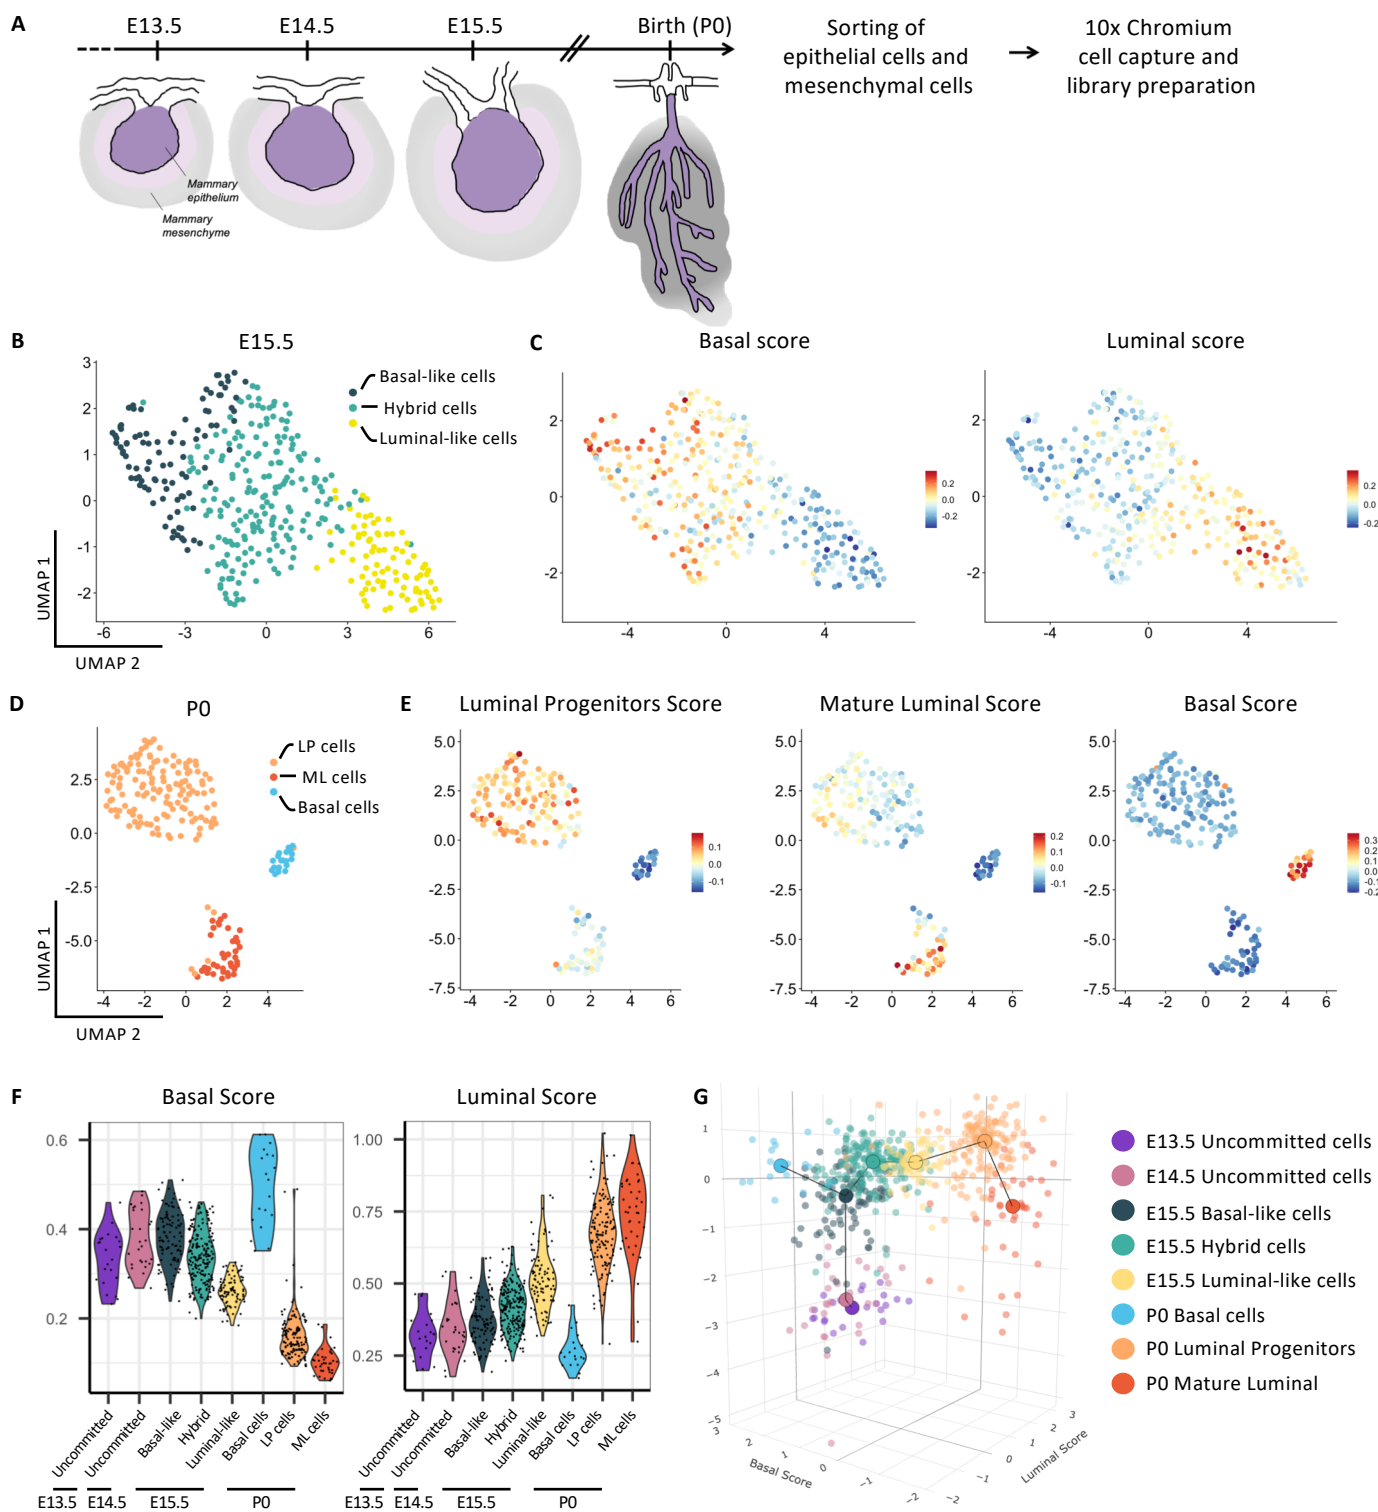



848 **Figure legends**

849 **Figure 1. Developmental atlas of the transcriptional signatures and 3D trajectory analysis of**  
850 **luminal and basal differentiation of single mammary epithelial cells from E13.5 until birth.**

851 (A) Scheme showing the isolation and sequencing strategy of mammary embryonic cells at four  
852 developmental stages spanning embryonic MG development. (B) UMAP plot of embryonic MECs  
853 isolated at E15.5 after subset analysis of non-proliferative MG epithelial cells. Cells are color-coded  
854 by cluster. (C) UMAP plots from (B) color-coded according to the expression of the single-cell ID  
855 scores in MECs: basal score (left) and luminal score (right). (D) UMAP plot of MECs isolated at P0  
856 after subset analysis of MG epithelial cells. (E) UMAP plots from (D) color-coded according to the  
857 expression of luminal progenitors (LP), mature luminal (ML) and basal cell (BC) scores. (F) Violin  
858 plots showing the expression levels of the basal and luminal scores in each cluster. (G) 3D trajectory  
859 of MECs from E13.5 at the origin of the mammary cellular hierarchy to P0 MECs positioned at the  
860 end of two divergent differentiation routes.

861

Figure 2. Pseudotime ordering identifies genes associated with early luminal and basal differentiation.

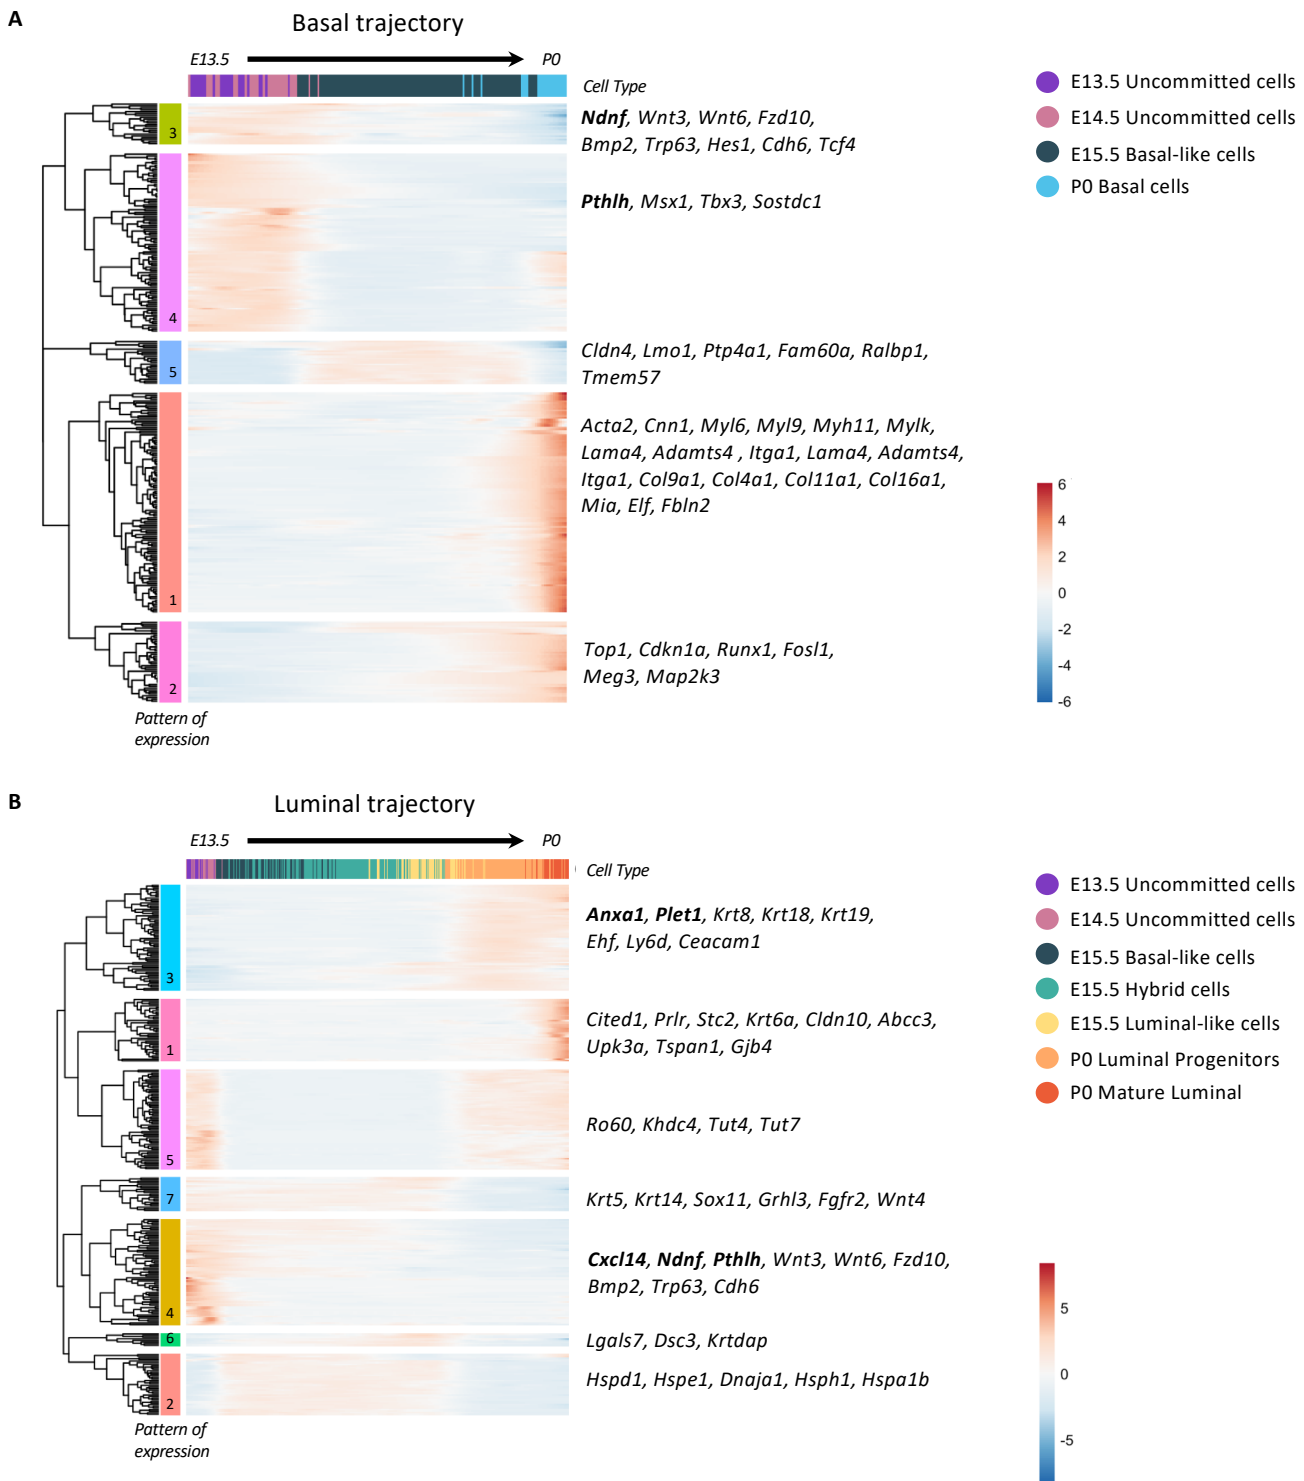

862 **Figure 2. Pseudotime ordering identifies genes associated with early luminal and basal**  
863 **differentiation.**

864 (A and B) Heatmaps illustrating genes exhibiting a differential pattern of expression along the  
865 pseudotime (from E13.5 to P0) towards the basal lineage (A) or the luminal lineage (B). Genes (rows)  
866 are clustered based on the dendrogram on the left and color-coded by their expression levels (from  
867 blue to red). The gene expression levels were smoothed using the GAM and scaled by row. Genes  
868 of interest are indicated on the right. Each set of genes with a specific pattern is color-coded on the  
869 left: 5 distinct patterns in the basal lineage (A) and 7 unique patterns in the luminal lineage (B).

870

Figure 3. Luminal and basal progenitors are already physically separated at E15.5.

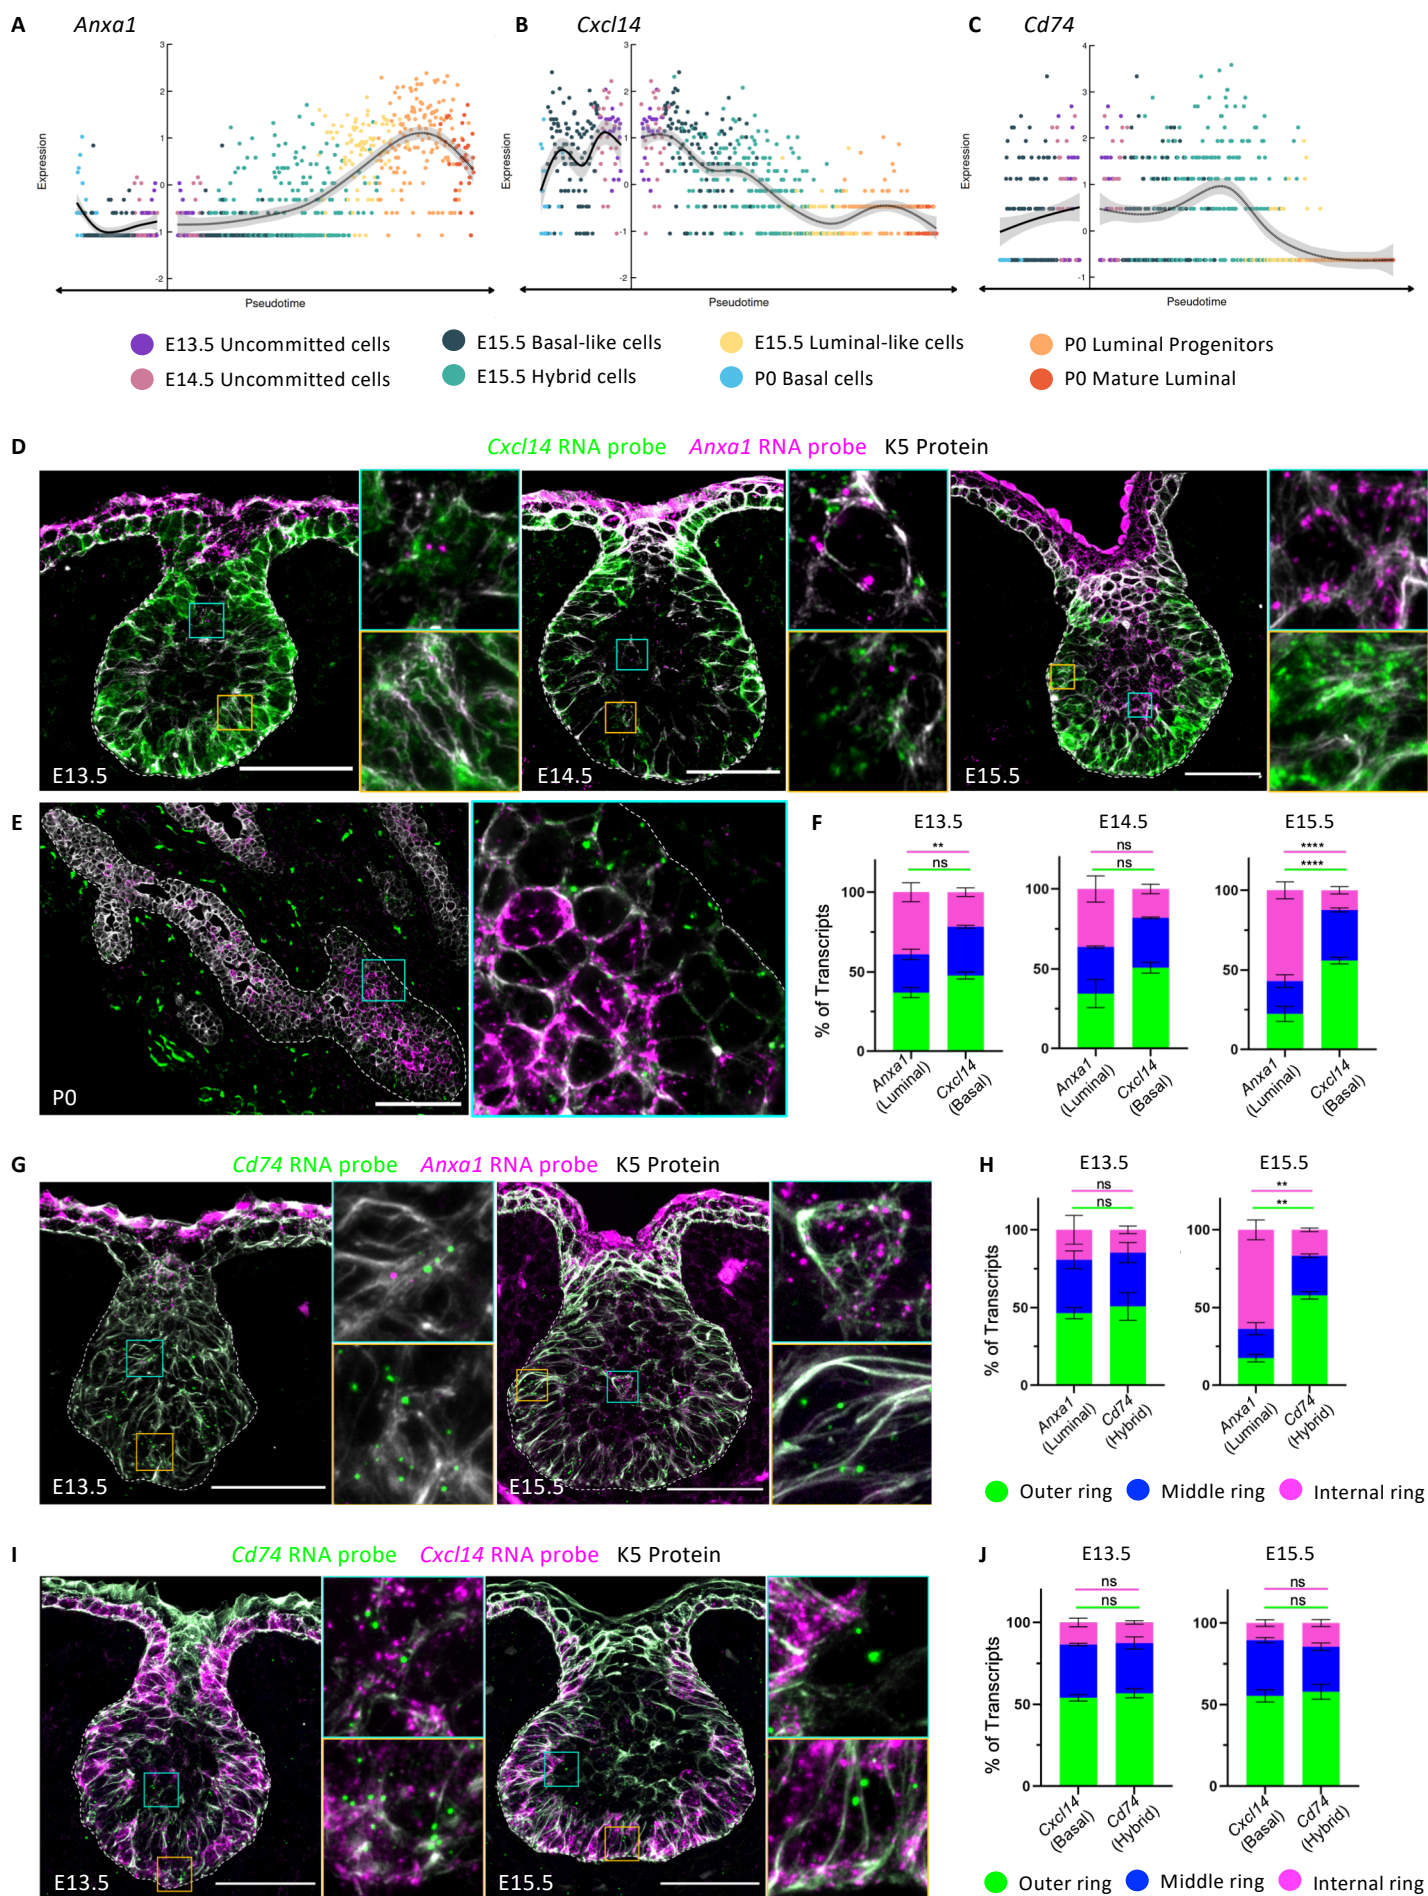

871 **Figure 3. Luminal and basal progenitors are already physically separated at E15.5.**  
872 (A-C) Examples of genes with pseudotime-dependent expression towards luminal differentiation  
873 (*Anxa1*, A), basal differentiation (*Cxcl14*, B) or with a higher expression in the hybrid cluster at E15.5  
874 (*Cd74*, C). Cells are color-coded by cluster. (D and E) Representative sections of embryonic  
875 mammary buds at E13.5, E14.5 and E15.5 (D) and P0 (E) showing the expression of *Cxcl14* (in green)  
876 and *Anxa1* (in magenta) detected by RNAscope and immunostained with K5 (in white). Dotted lines  
877 delineate the BM. Scale bars: 50  $\mu\text{m}$  (D), 100  $\mu\text{m}$  (E). (F) Quantification of the proportion of *Anxa1*  
878 and *Cxcl14* transcripts in each ring at each developmental stage. (G) Representative sections of  
879 embryonic mammary buds at E13.5 and E15.5, showing the expression of *Cd74* (in green) and *Anxa1*  
880 (in magenta) detected by RNAscope and immunostained with K5 (in white). Dotted lines delineate  
881 the BM. Scale bar: 50  $\mu\text{m}$ . (H) Quantification of the proportion of *Cd74* and *Anxa1* transcripts in each  
882 ring at each developmental stage. (I) Representative sections of embryonic mammary buds at E13.5  
883 and E15.5 showing the expression of *Cd74* (in green) and *Cxcl14* (in magenta) detected by RNAscope  
884 and immunostained with K5 (in white). Dotted lines delineate the BM. Scale bar: 50  $\mu\text{m}$ . (J)  
885 Quantification of the proportion of *Cd74* and *Cxcl14* transcripts in each ring at each developmental  
886 stage. Statistical significance in (F), (H) and (J) was assessed with two-way ANOVA test between the  
887 two probes. The statistical analysis was performed between the outside ring (green line) and the  
888 inside ring (magenta line). ns: non-significant, \*\* indicates  $p < 0.01$  and \*\*\*\* indicates  $p < 0.0001$ .  
889



Figure 4. The embryonic mammary mesenchyme contains two spatially distinct cell populations.

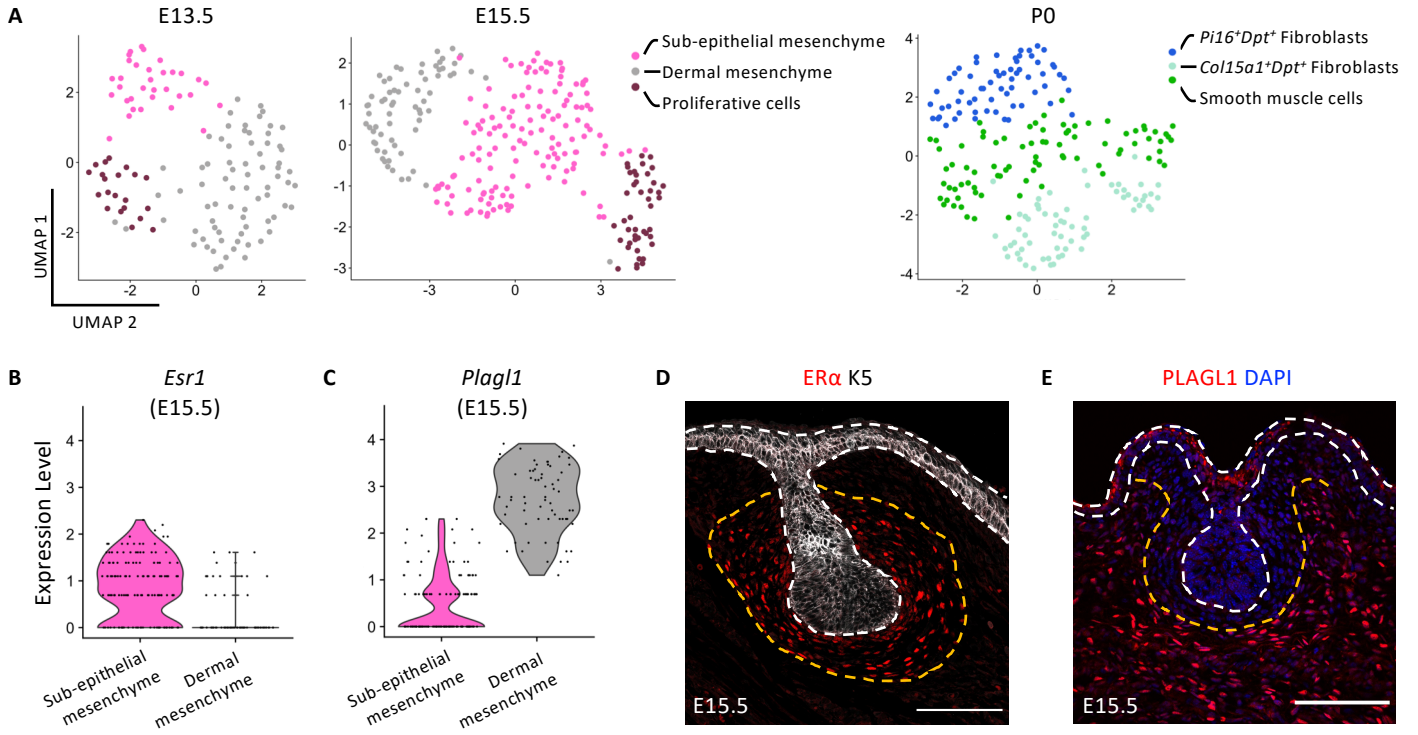

890 **Figure 4. The embryonic mammary mesenchyme contains two spatially distinct cell**  
891 **populations.**

892 (A) UMAP plots of embryonic mammary mesenchymal cells isolated at E13.5, E15.5 and P0 after  
893 subset analysis. Cells are color-coded by cluster. (B and C) Violin plots representing the expression  
894 levels of *Esr1* (B) and *Plagl1* (C) in sub-epithelial and dermal mesenchyme respectively, at E15.5. (D  
895 and E) Representative sections of embryonic mammary buds at E15.5 immunostained for ER $\alpha$  (in  
896 red) and K5 (in white) (D) or PLAGL1 (in red) and DAPI (in blue) (E). Dotted lines delineate the BM  
897 (in white) and the two mesenchymal compartments (in orange). Scale bars: 100  $\mu$ m.

898

Figure 5. FGF10 accelerates embryonic mammary branching without affecting cell proliferation.

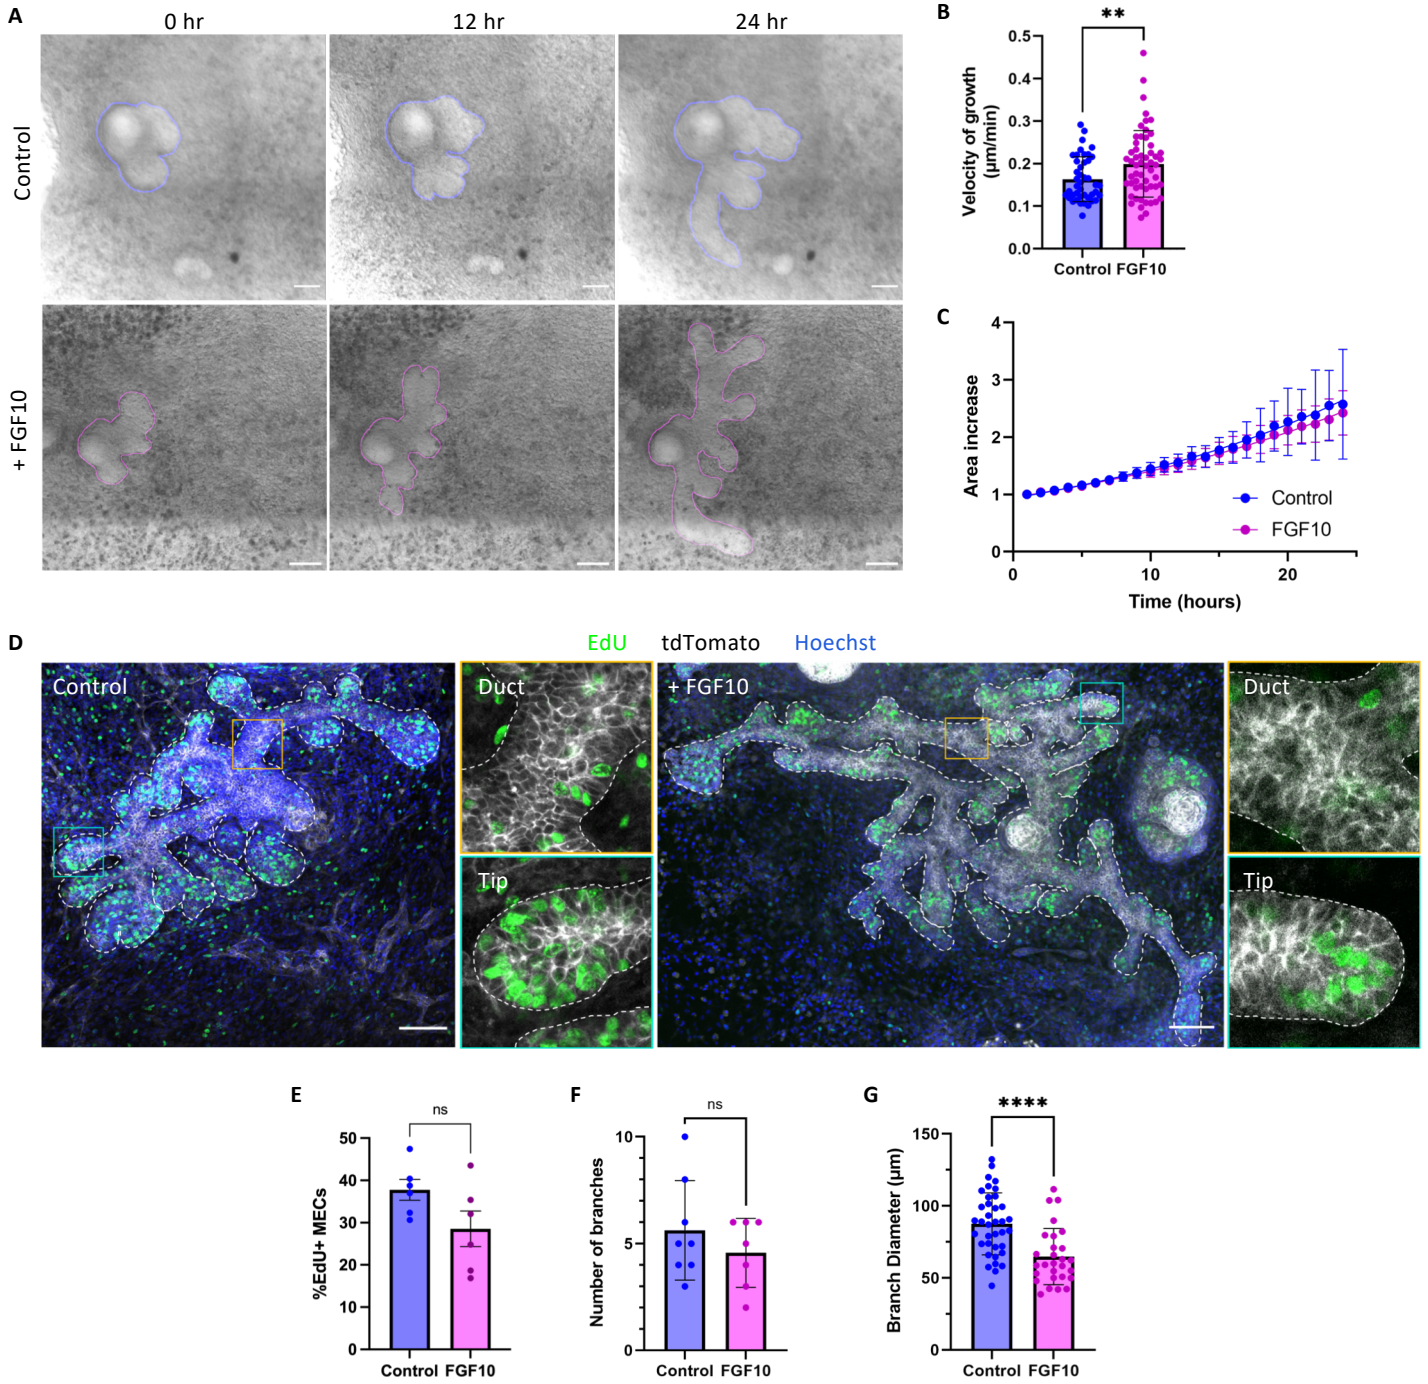



899 **Figure 5. FGF10 accelerates embryonic mammary branching without affecting cell**  
900 **proliferation.**

901 (A) Time-lapse images of a mammary explant grown in control medium (top) or in the presence of  
902 FGF10 (bottom) for 24 hr. T= 0h refers to 4 days in culture. Scale bars: 100  $\mu$ m. The rendered surface  
903 of the mammary epithelium is outlined in blue (in the control bud) and in magenta (in the FGF10  
904 condition). (B) Quantification of the velocity of branch growth in control conditions (n= 43) and in the  
905 presence of FGF10 in the medium (n= 56). (C) Fold change increase in area in control and FGF10  
906 conditions. In both cases, the area is doubled within 16 hr in culture. (D) Representative whole-mount  
907 immunostaining of an embryonic mammary gland cultured in control and FGF10 conditions showing  
908 Edu<sup>+</sup> cells (in green), membrane tdTomato (in white) and DAPI (in blue). Mammary buds were  
909 dissected at day E13.5 and cultured *ex vivo* for 7 days. Orange outlined insets show a duct region  
910 and blue outlined insets show a tip region. (E, F and G) Quantification of Edu<sup>+</sup> cells (E), number of  
911 branches (F) and branch diameter (G) in control and FGF10 conditions. Statistical significance was  
912 assessed with two-tailed unpaired Welch's t-test. \*\* p< 0.01, \*\*\*\* p<0.0001, ns: non-significant.

913



914 **Figure 6. Proposed model for lineage segregation of embryonic mammary epithelial cells**  
915 **during development.**

916 (A) Proposed model of luminal and basal differentiation trajectories from E13.5 to P0. (B) Cartoon  
917 depicting the spatial localization of the different cell types distinguishable in the embryonic mammary  
918 bud at E13.5 and E15.5.

919

920
